# Supplementary material for: Discovery and Optimization of the First Highly Effective and Orally Available Galectin-3 Inhibitors for Treatment of Fibrotic Disease
Source: PubMed Central journal article supplement — J Med Chem. 2022 Sep 26;65(19):12626–38. doi: 10.1021/acs.jmedchem.2c00660 (PMC9574852; doi:10.1021/acs.jmedchem.2c00660), 2022-09-26

## Supporting Information

### Discovery and Optimization of the First Highly Effective and Orally Available Galectin-3 Inhibitors for Treatment of Fibrotic Disease

Fredrik R. Zetterberg,<sup>\*,a</sup> Alison MacKinnon,<sup>\*,b</sup> Thomas Brimert,<sup>c,d</sup> Lise Gravelle,<sup>e</sup> Richard E. Johnsson,<sup>c</sup> Barbro Kahl-Knutson,<sup>d</sup> Hakon Leffler,<sup>f</sup> Ulf J. Nilsson,<sup>a,g</sup> Anders Pedersen,<sup>e</sup> Kristoffer Peterson,<sup>a,g</sup> James A. Roper,<sup>h</sup> Hans Schambye,<sup>e</sup> Robert J. Slack,<sup>h</sup> Susan Tantawi,<sup>e</sup>

<sup>a</sup>Galecto Biotech AB, Sahlgrenska Science Park, Medicinargatan 8 A, SE-413 46 Gothenburg, Sweden

<sup>b</sup>Galecto Biotech ApS, Nine Edinburgh Bioquarter, 9 Little France Rd, Edinburgh EH16 4UX, UK

<sup>c</sup>Red Glead Discovery AB, Medicon Village, SE-223 63, Lund, Sweden

<sup>d</sup>Biochemistry and Structural Biology, Center for Molecular Protein Science, Department of Chemistry, Lund University, Box 124, SE-221 00, Lund, Sweden

<sup>e</sup>Galecto Biotech ApS, Cobis Science Park, Ole Maaloes Vej 3, DK-2200, Copenhagen, Denmark

<sup>f</sup>Department of Laboratory Medicine, Lund University, Box 124, SE-221 00, Lund, Sweden

<sup>g</sup>Centre for Analysis and Synthesis, Department of Chemistry, Lund University, Box 124, SE-221 00, Lund, Sweden

<sup>h</sup>Galecto Biotech ApS, Stevenage Bioscience Catalyst, Stevenage, Hertfordshire, SG1 2FX UK

Corresponding Authors

\*Fredrik R. Zetterberg; e-mail: [FZ@galecto.com](mailto:FZ@galecto.com); phone: +46 763240495

\*Alison MacKinnon; e-mail: [am@galecto.com](mailto:am@galecto.com); phone: +44 7711832576



## Table of Contents

|         |                                                                                                                                                                                                       |
|---------|-------------------------------------------------------------------------------------------------------------------------------------------------------------------------------------------------------|
| S3–S11  | NMR-spectra of synthesized compounds                                                                                                                                                                  |
| S12–S14 | Purity chromatograms                                                                                                                                                                                  |
| S15     | Surface Plasmon Resonance analysis and Table S1                                                                                                                                                       |
| S16     | Cell cytotoxicity and Table S2                                                                                                                                                                        |
| S17     | Figure S1 Pharmacokinetic profile of <b>11d</b> and bleomycin-induced lung fibrosis<br>Figure S2                                                                                                      |
| S19     | Specificity screen of <b>11d</b> towards 87 different targets                                                                                                                                         |
| S26     | <i>In vitro</i> assessment of effects of <b>11b</b> and <b>11d</b> on human potassium channel using human embryonic kidney (HEK) 293 cells transfected with a human ether-a-go-go-related gene (hERG) |
| S27     | <i>In vivo</i> assessment of QTc effect of <b>11b</b> and <b>11d</b> in anesthetized guinea pig                                                                                                       |
| S27     | <b>Data collection and structure solution of galectin-3C in complex with 11d</b>                                                                                                                      |
| S30     | Plots of passage A>B over CACO-2 over ClogD(pH 7.4) and ertlPSA                                                                                                                                       |



**6-S-Butyl-3,3',6-trideoxy-3,3'-bis-[4-(3-fluorophenyl)-1H-1,2,3-triazol-1-yl]-1,1'-sulfanediyl-di-β-D-galactopyranoside 3**

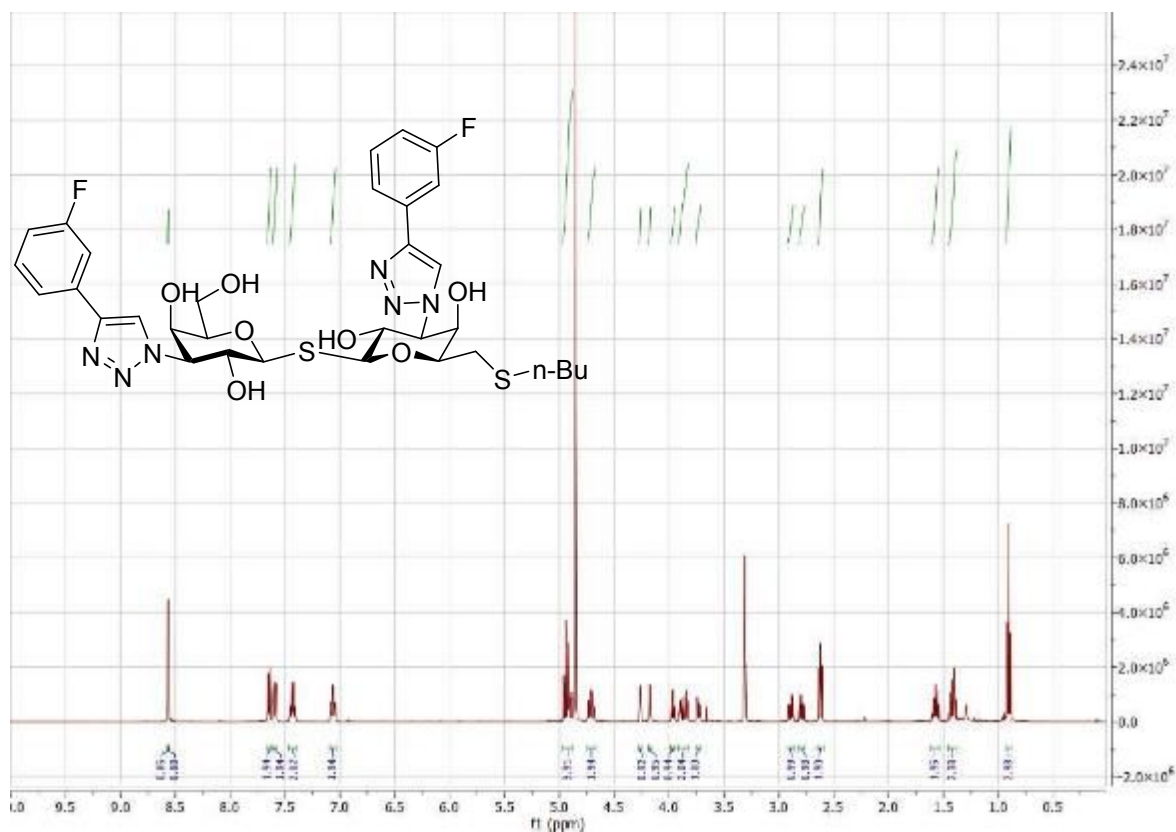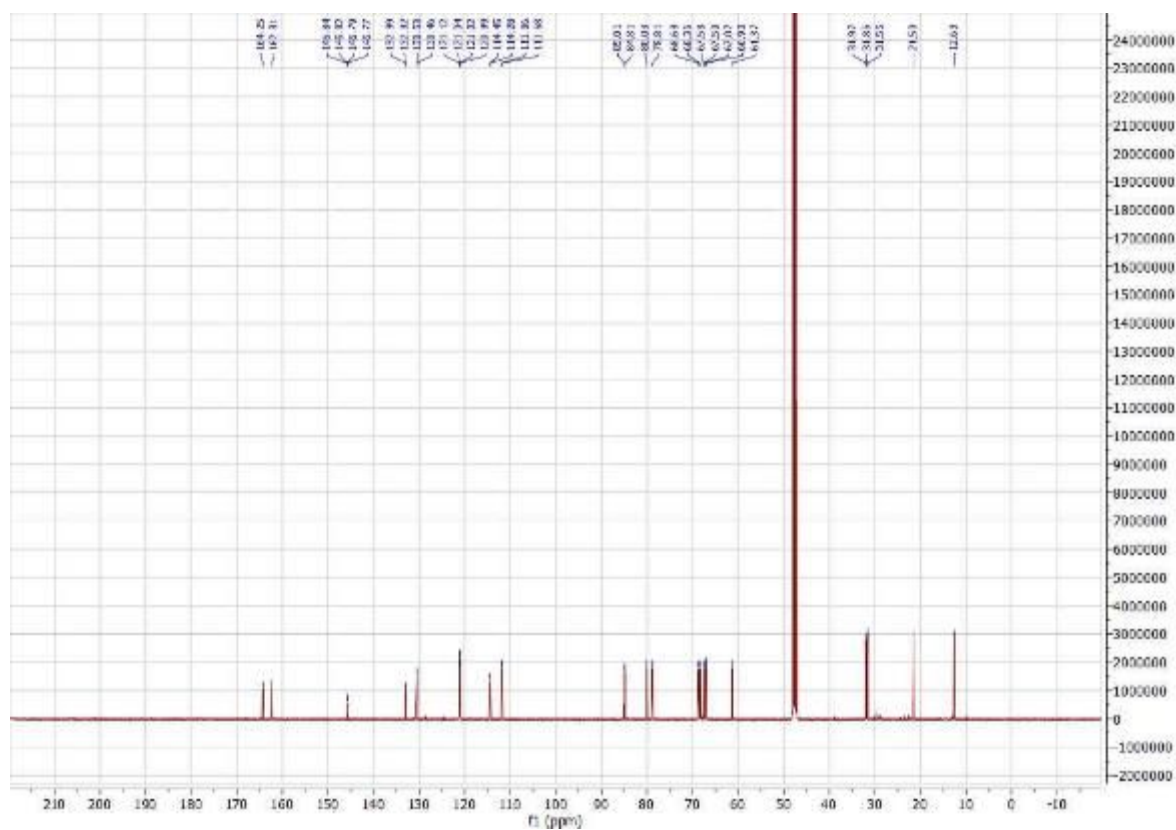

**3,3',6-Trideoxy-3,3'-bis-[4-(3-fluorophenyl)-1H-1,2,3-triazol-1-yl]-1,1'-sulfanediyl-di-β-D-galactopyranoside 4**

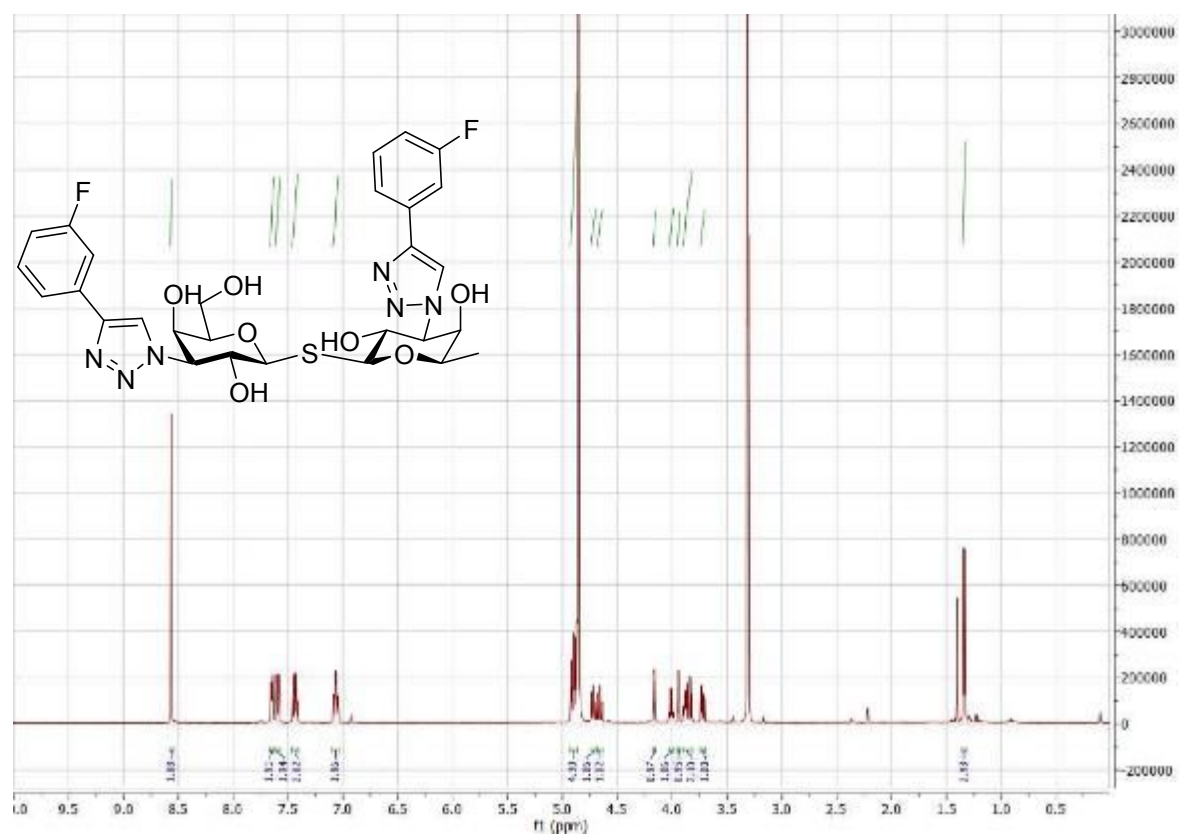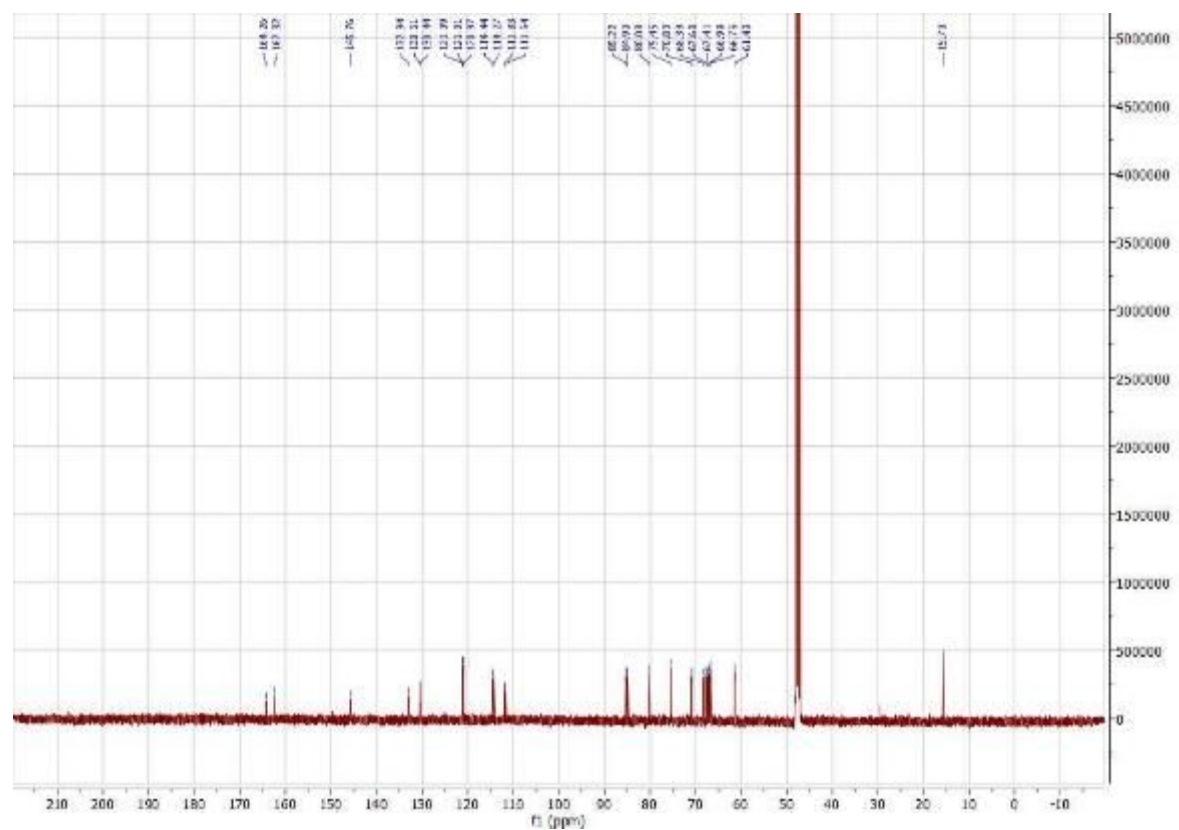

**3,3'-Dideoxy-3,3'-bis-[4-(3-fluorophenyl)-1*H*-1,2,3-triazol-1-yl]-2,2',4,4',6-penta-*O*-methyl-1,1'-sulfanediyl-di- $\beta$ -D-galactopyranoside 5a**

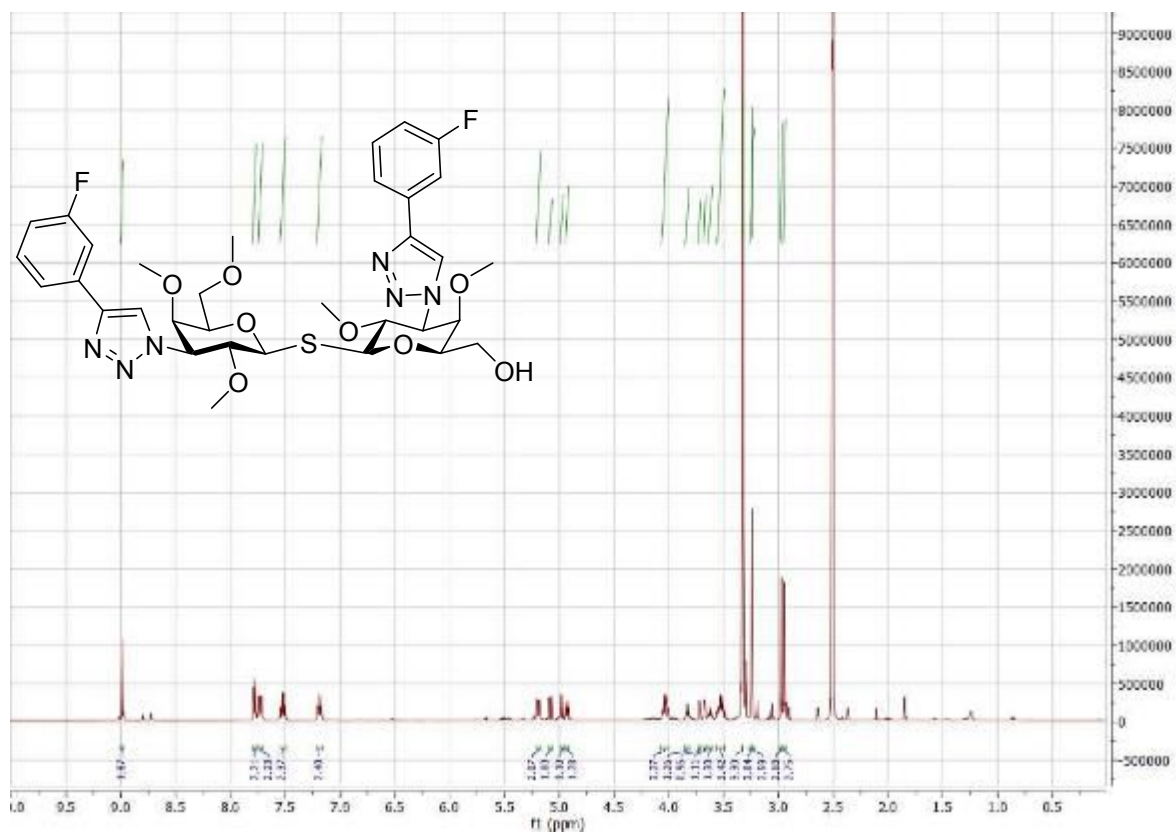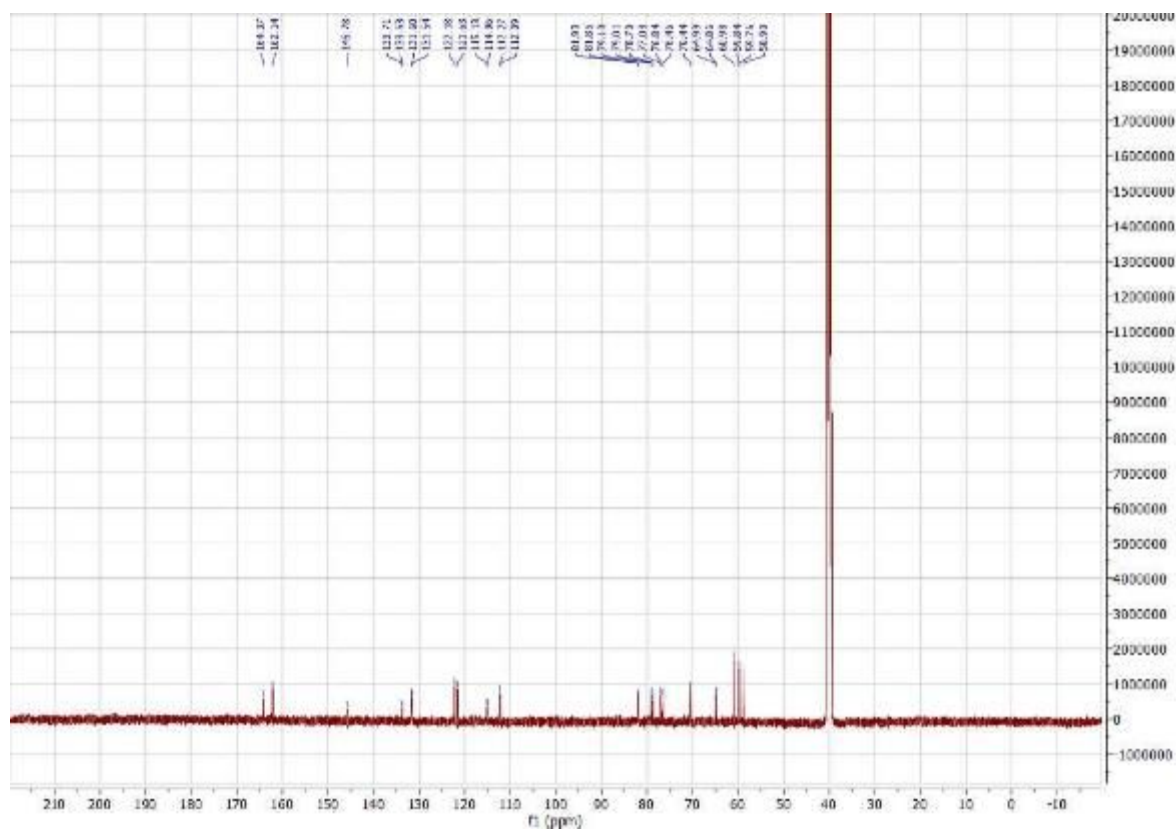





**4-Acetamidophenyl 3-deoxy-3-[4-(3,4,5-trifluorophenyl)-1H-1,2,3-triazol-1-yl]-1-thio-β-D-galactopyranoside 8a**

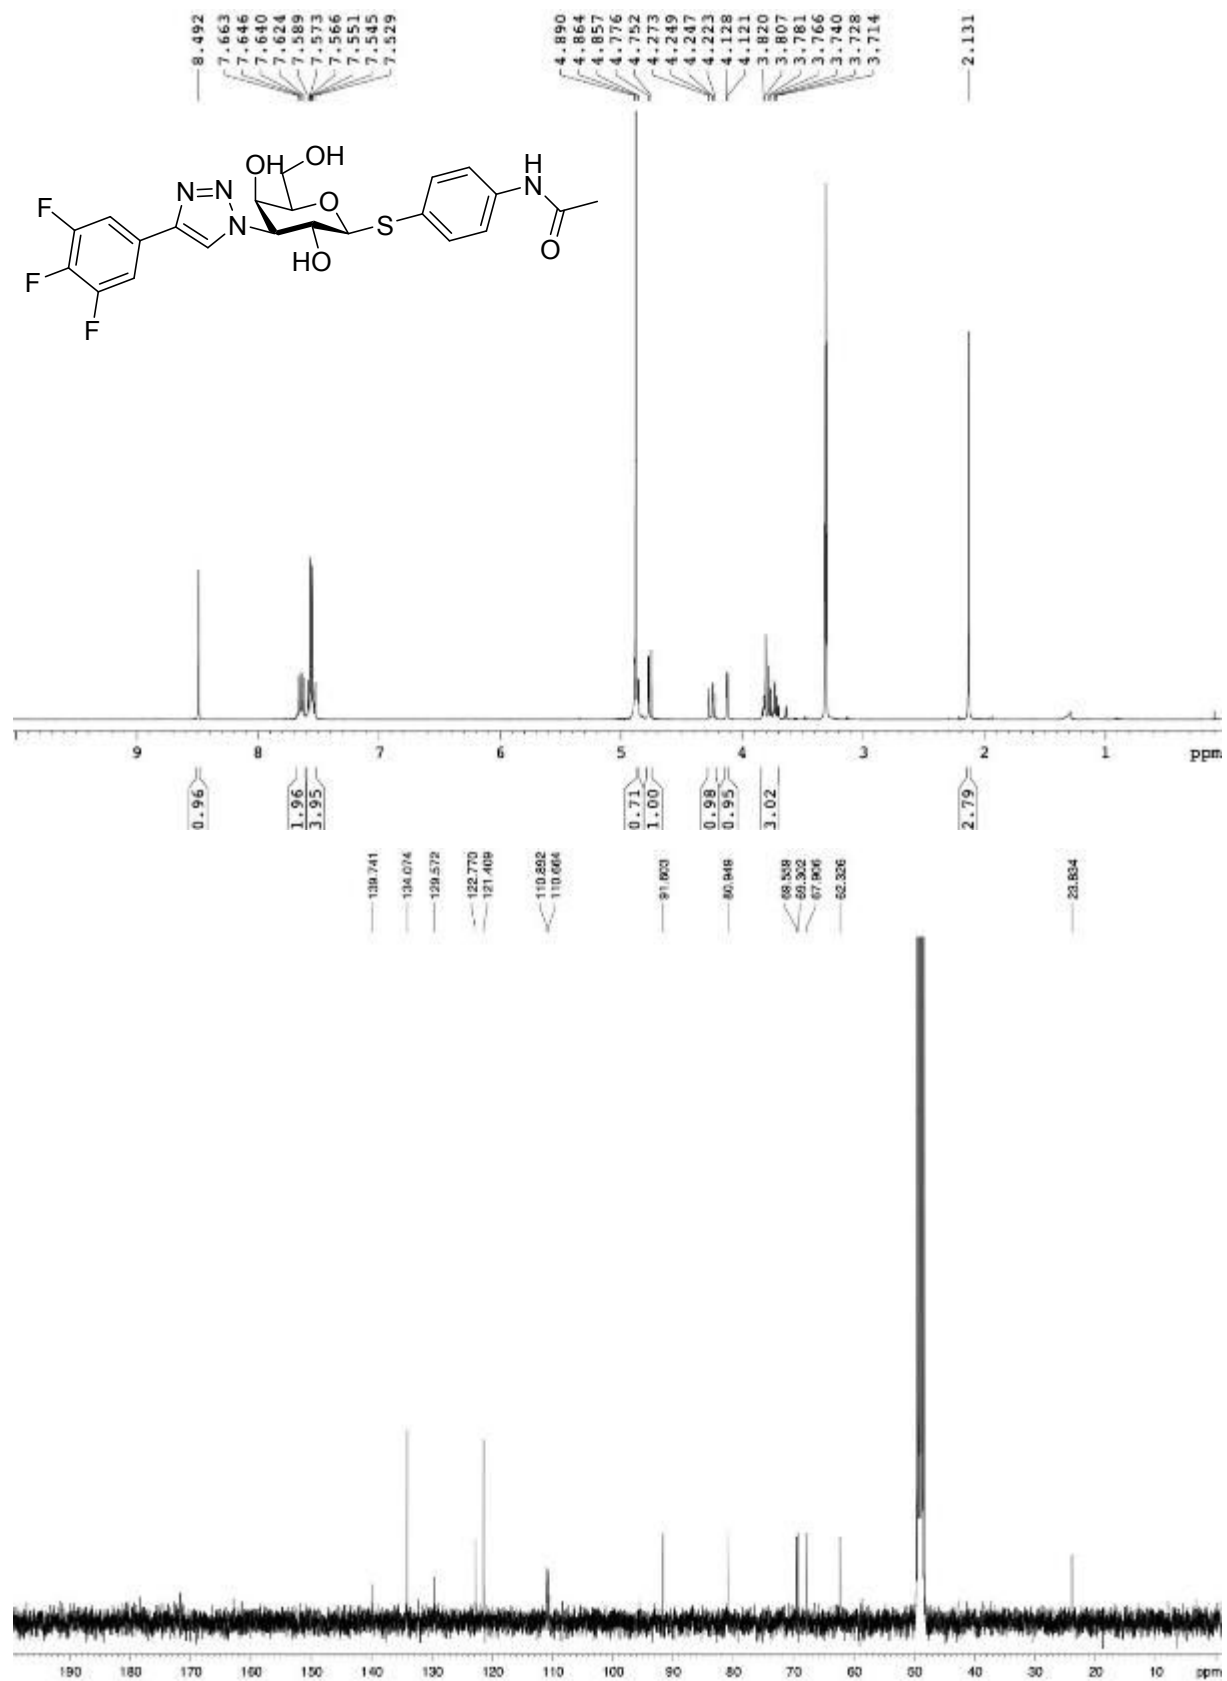

**3-Methoxyphenyl 3-deoxy-3-[4-(3,4,5-trifluorophenyl)-1H-1,2,3-triazol-1-yl]-1-thio-β-D-galactopyranoside 8b**

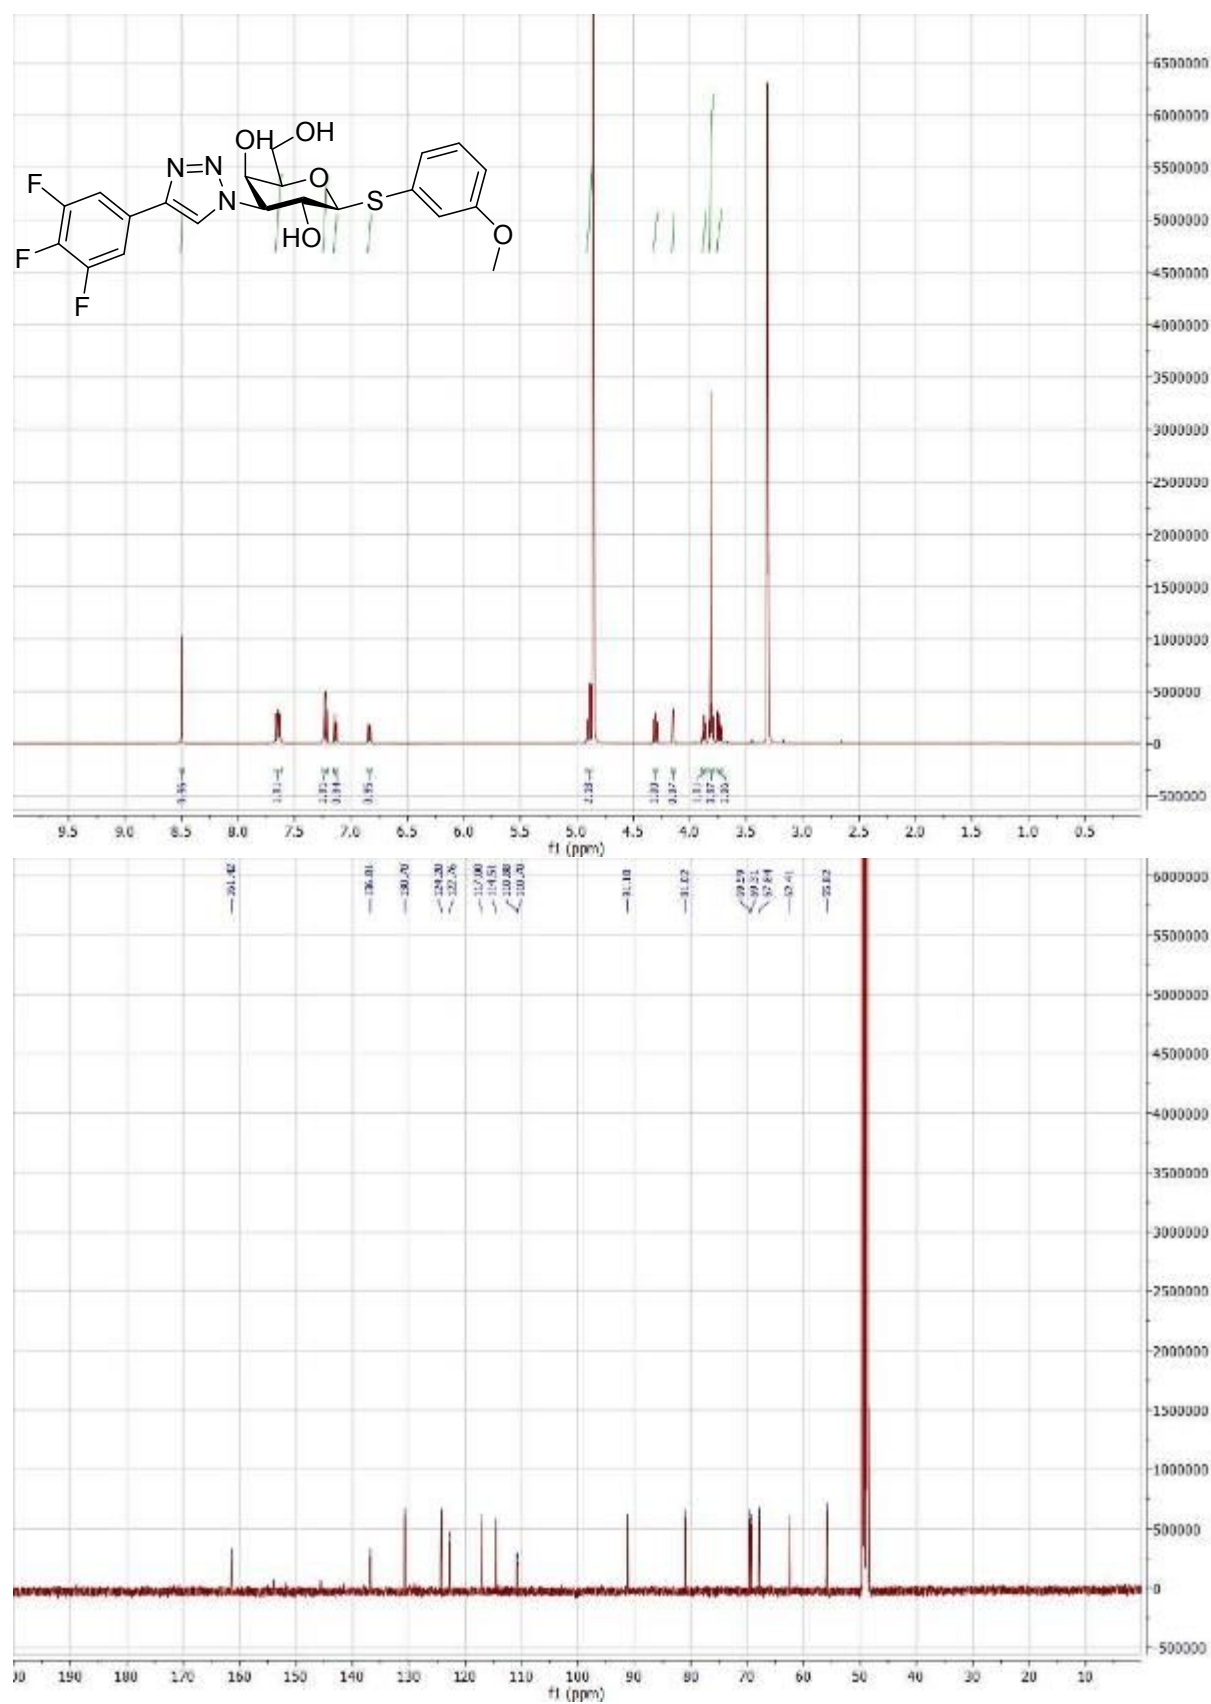

**4-Acetamidophenyl 3-deoxy-3-[4-(3,4,5-trifluorophenyl)-1H-1,2,3-triazol-1-yl]-1-thio- $\alpha$ -D-galactopyranoside 11a**

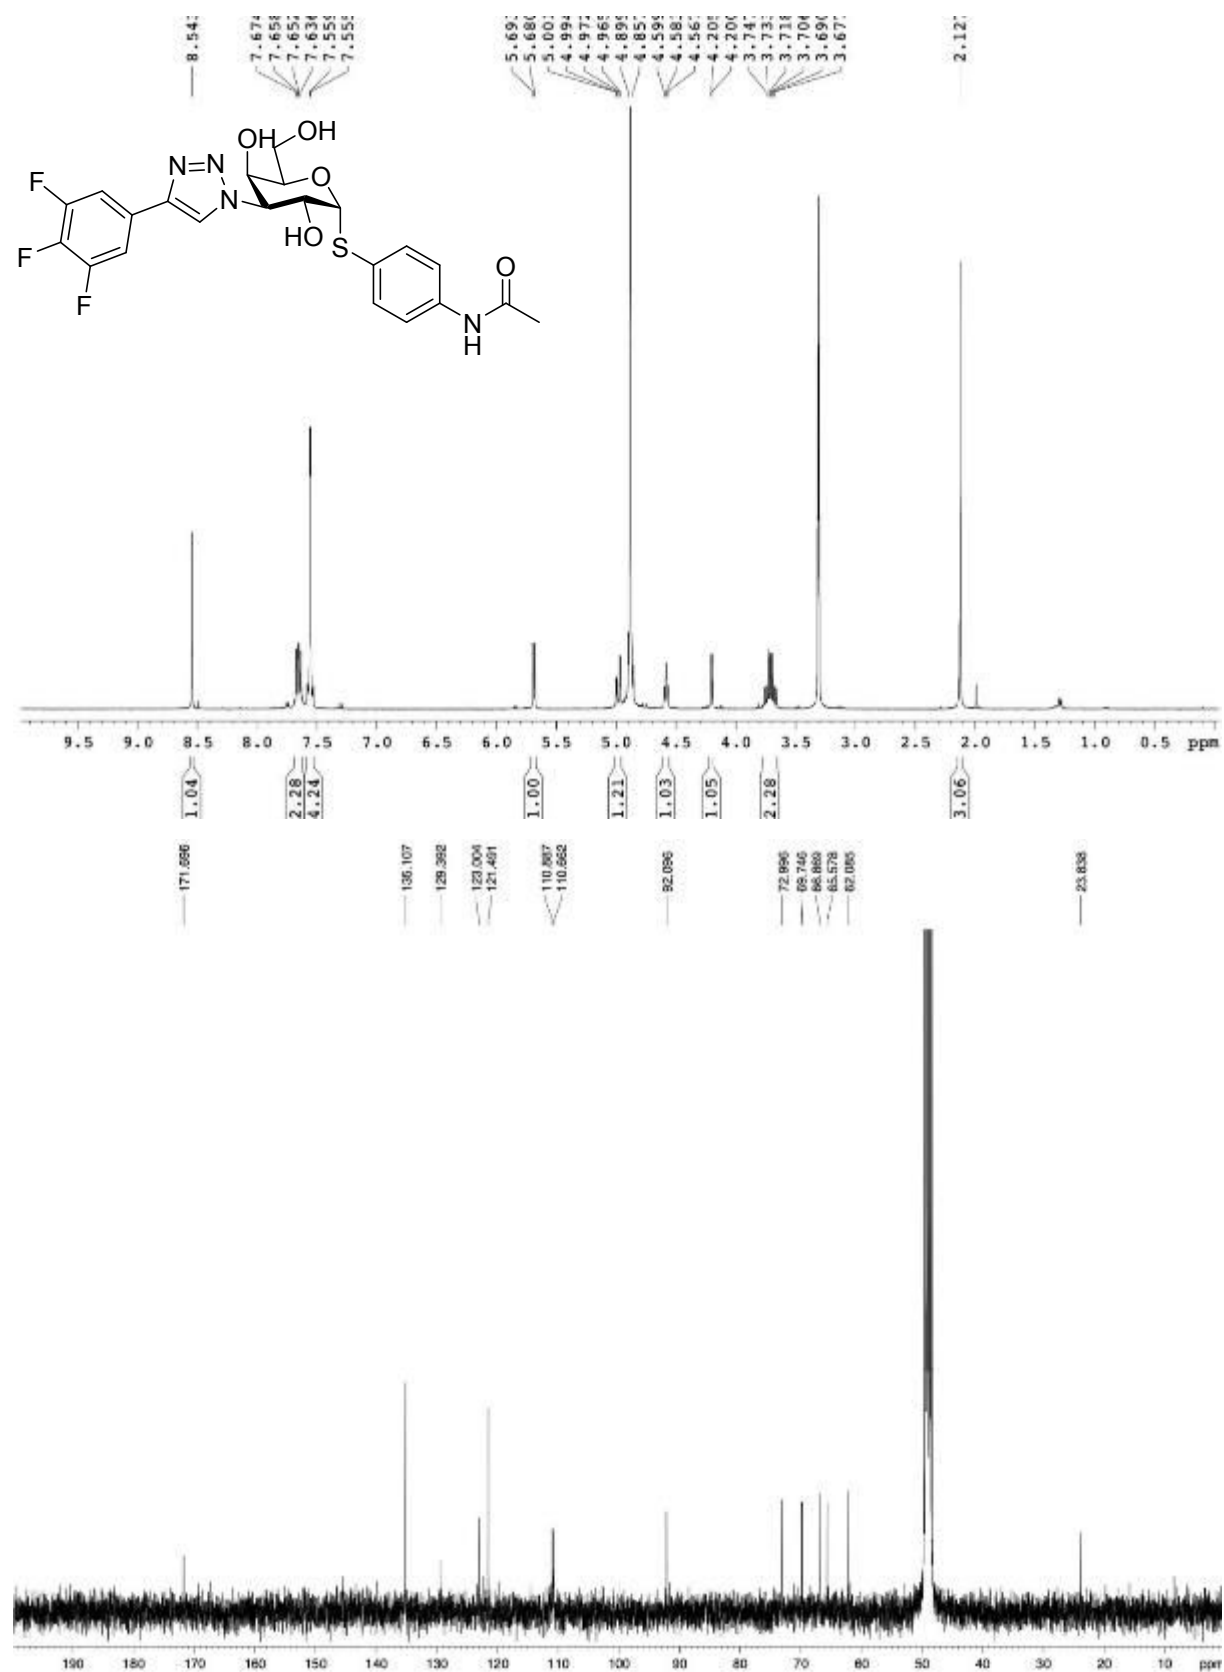

**5-Bromopyridin-3-yl 3-deoxy-3-[4-(3,4,5-trifluorophenyl)-1H-1,2,3-triazol-1-yl]-1-thio- $\alpha$ -D-galactopyranoside 11d**

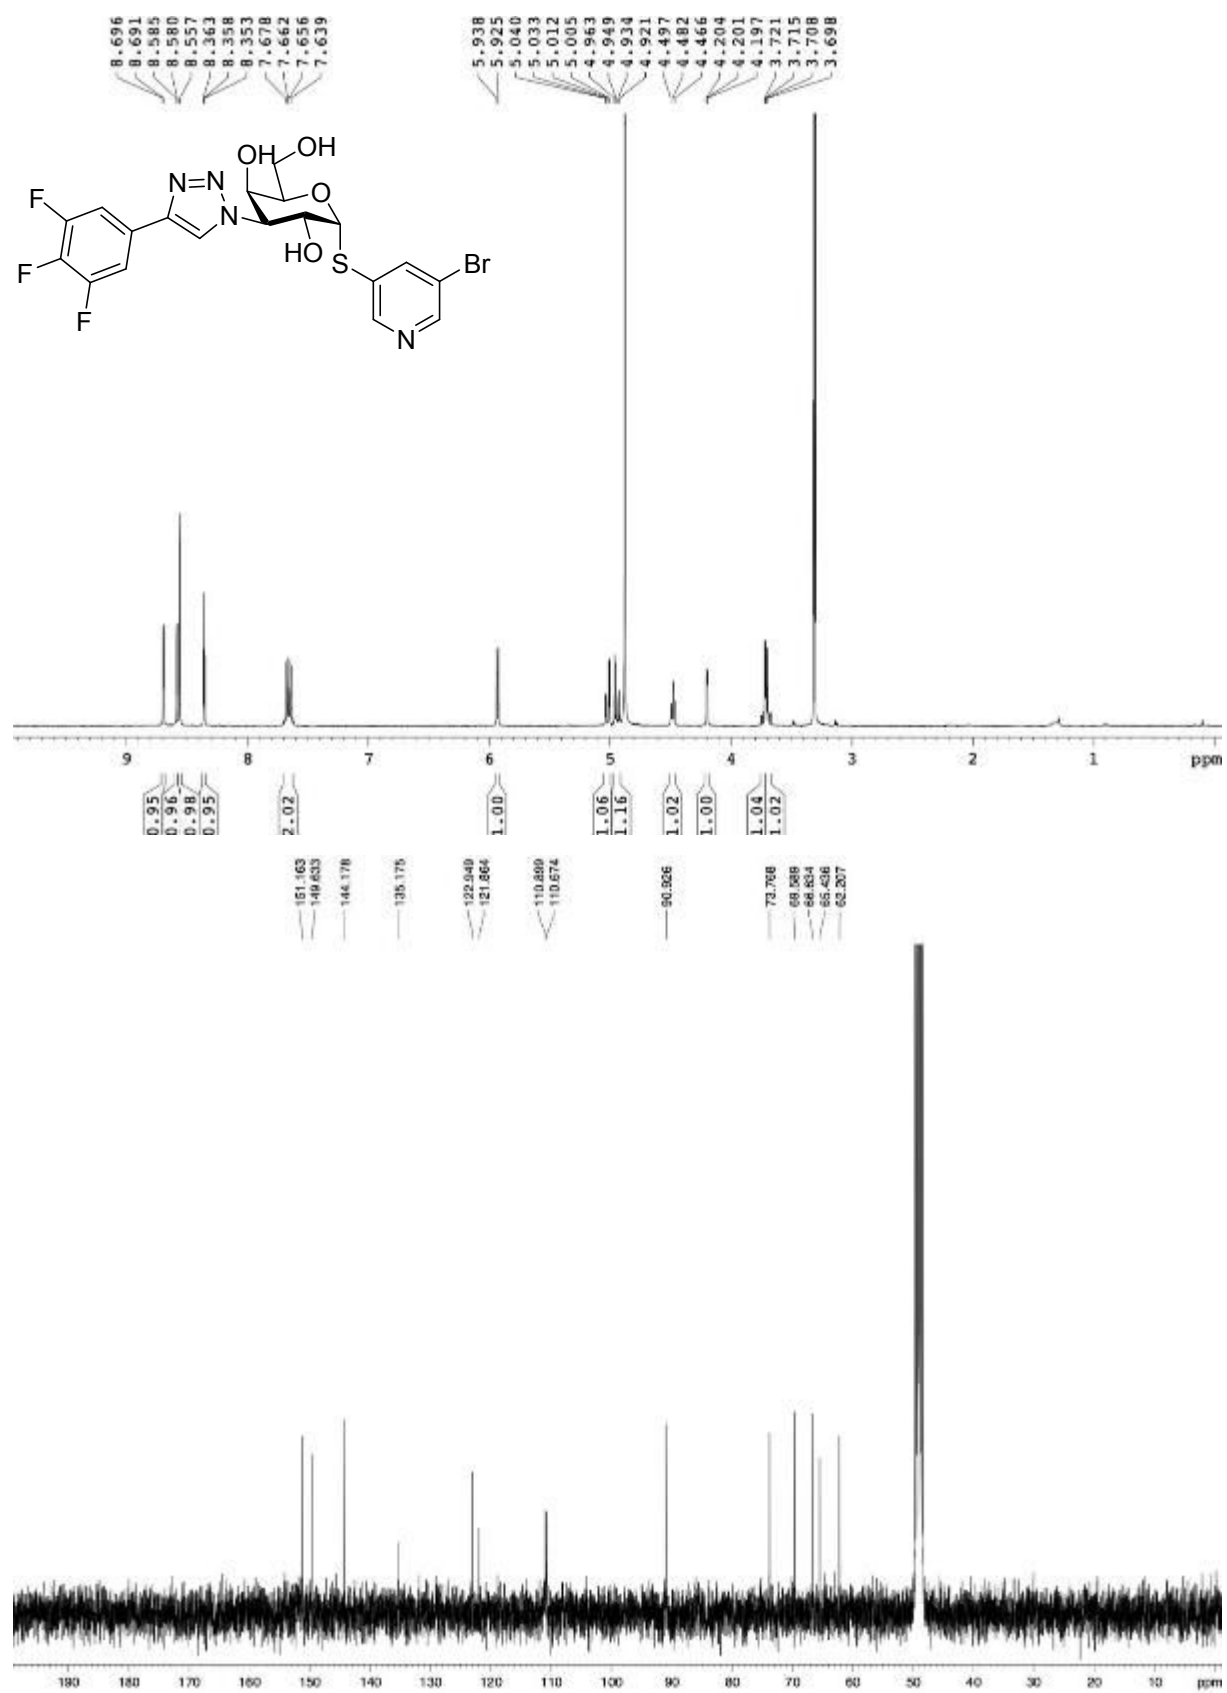



**3,3'-Dideoxy-3,3'-bis-[4-(3-fluorophenyl)-1*H*-1,2,3-triazol-1-yl]-2,2',4,4',6-penta-*O*-methyl-1,1'-sulfanediyl-di- $\beta$ -D-galactopyranoside 5a**

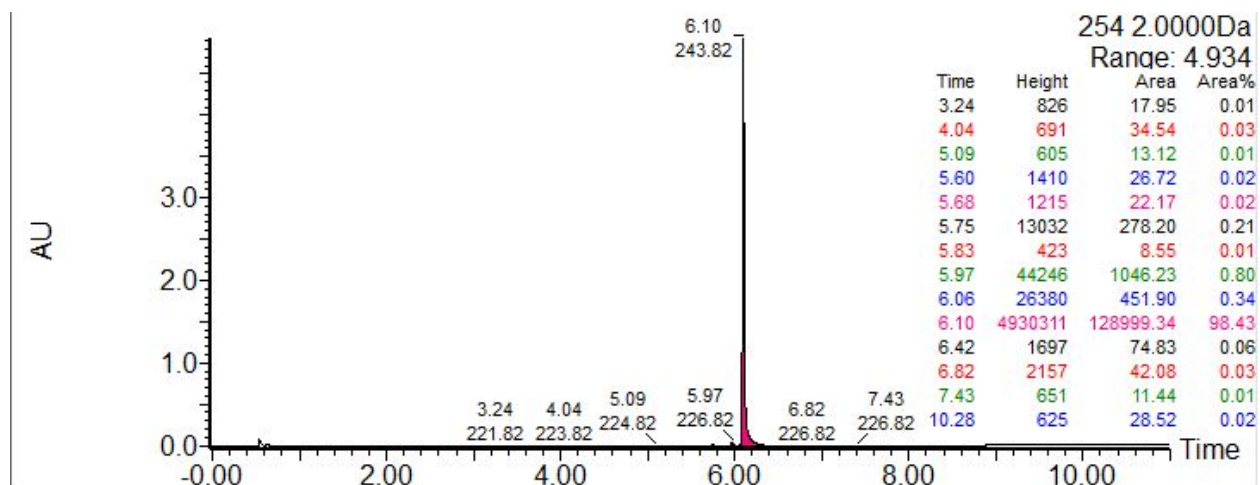

**3,3'-Dideoxy-3,3'-bis-[4-(3-fluorophenyl)-1*H*-1,2,3-triazol-1-yl]-2,2',4,4',6,6'-hexa-*O*-methyl-1,1'-sulfanediyl-di- $\beta$ -D-galactopyranoside 5b**

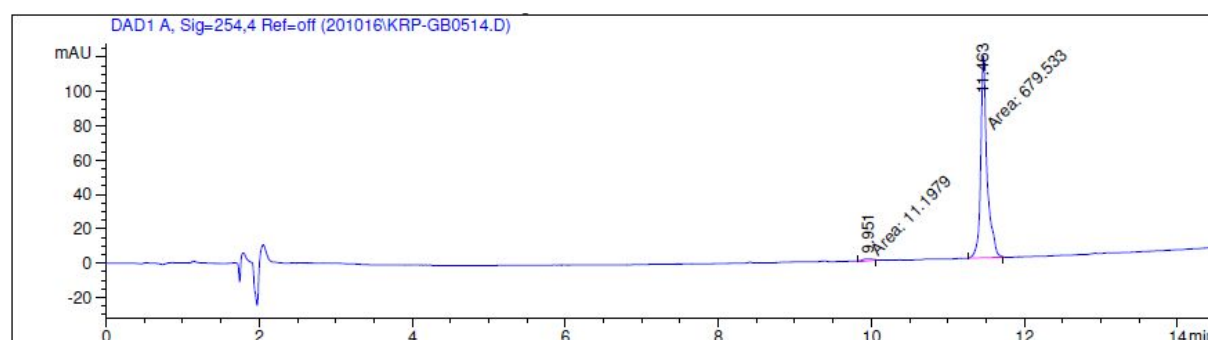

**4-Acetamidophenyl 3-deoxy-3-[4-(3,4,5-trifluorophenyl)-1*H*-1,2,3-triazol-1-yl]-1-thio- $\beta$ -D-galactopyranoside 8a**

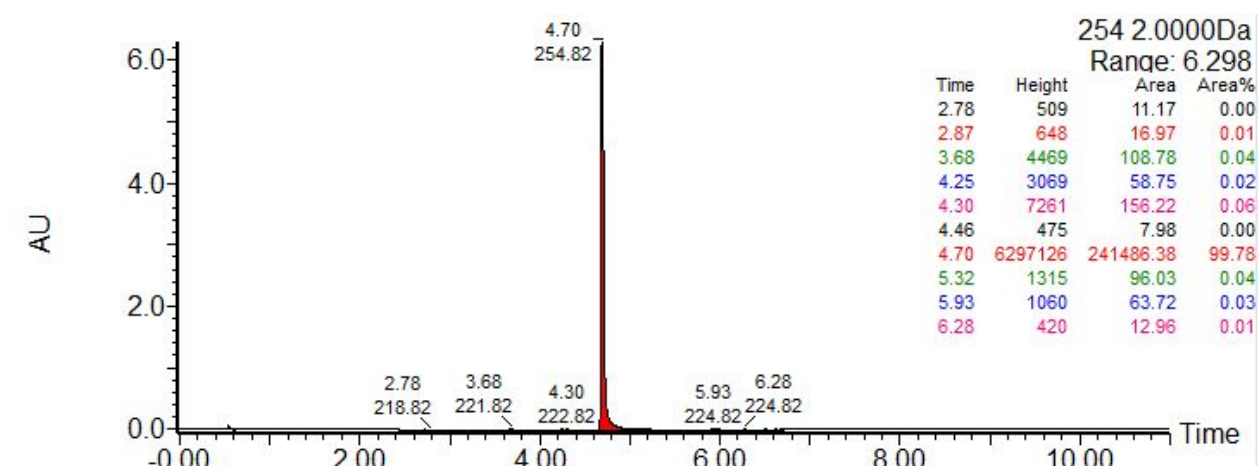

**3-Methoxyphenyl 3-deoxy-3-[4-(3,4,5-trifluorophenyl)-1H-1,2,3-triazol-1-yl]-1-thio-β-D-galactopyranoside 8b**

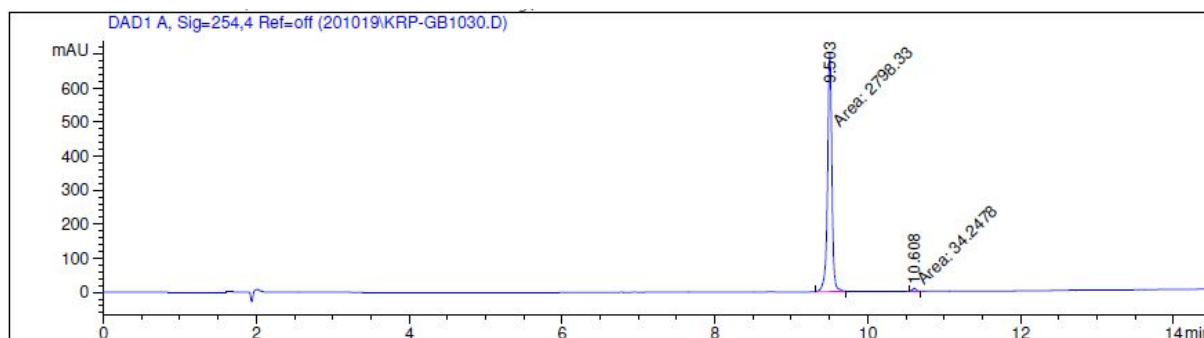

**4-Acetamidophenyl 3-deoxy-3-[4-(3,4,5-trifluorophenyl)-1H-1,2,3-triazol-1-yl]-1-thio-α-D-galactopyranoside 11a**

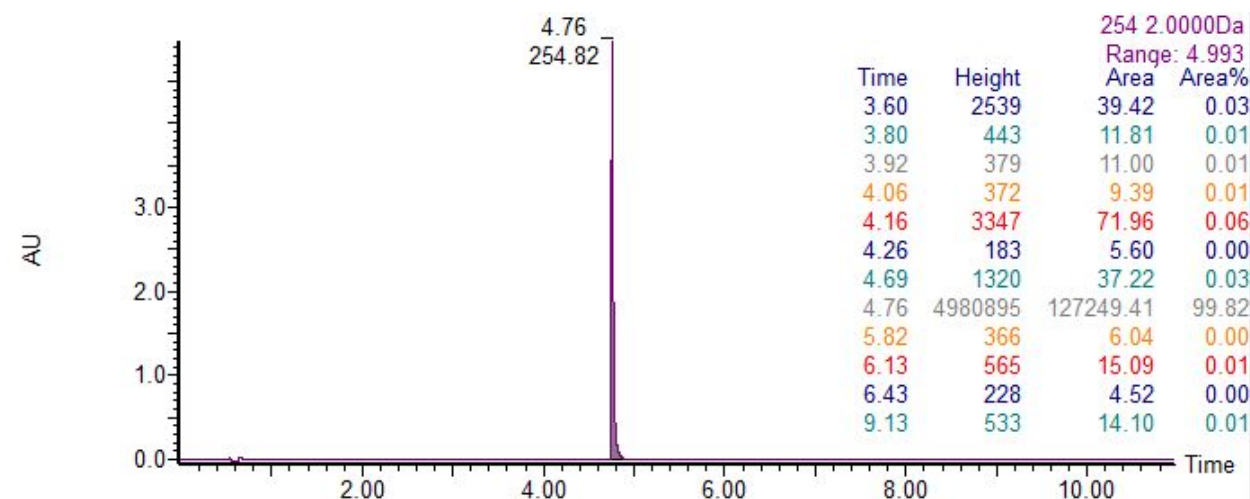

**5-Bromopyridin-3-yl 3-deoxy-3-[4-(3,4,5-trifluorophenyl)-1H-1,2,3-triazol-1-yl]-1-thio-α-D-galactopyranoside 11d**

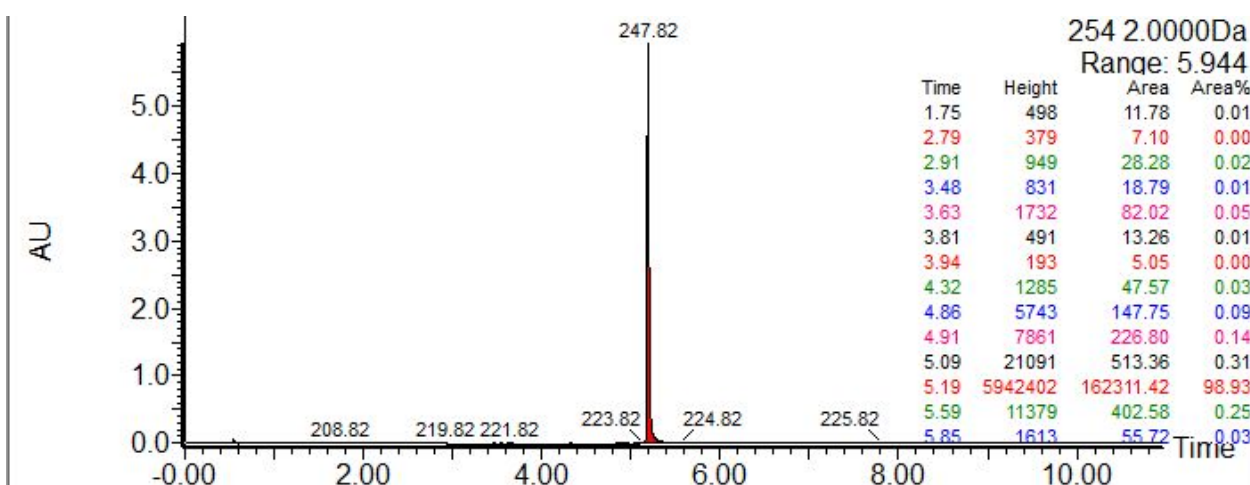

**Surface Plasmon Resonance (SPR) Analysis.** To detect the affinity of **11d** to human and mouse full-length galectin-1 and -3, SPR analysis was performed with BIAcore™ (Cytiva, USA) in the presence of 5% DMSO at 25°C. Target protein was immobilized onto a CM3 sensorchip via amine coupling and different concentrations of **11d** were injected at a flow rate of 30 µl/min. SPR response was recorded as a function of time at 25°C between proteins, and  $k_{on}$  and  $k_{off}$  were determined using global fitting parameters with a 1:1 binding model and  $K_d$  calculated from steady-state fitting; **11d** binding to galectin was stable at 25°C for the duration of the experiment (Table S1).

**Table S1.** SPR binding affinity and kinetics for **11d** against human and mouse galectin-3 and -1.

|                               | <b>Human Galectin-3</b> | <b>Mouse Galectin-3</b> | <b>Human Galectin-1</b> | <b>Mouse Galectin-1</b> |
|-------------------------------|-------------------------|-------------------------|-------------------------|-------------------------|
| $K_d$ (µM)                    | 0.037                   | 2.2                     | 3.7                     | 5.1                     |
| $k_{on}$ (M.s <sup>-1</sup> ) | 4.77 x 10 <sup>6</sup>  | 7.26 x 10 <sup>4</sup>  | 7.86 x 10 <sup>5</sup>  | 3.68 x 10 <sup>4</sup>  |
| $k_{off}$ (s <sup>-1</sup> )  | 0.21                    | 0.21                    | 3.63                    | 0.25                    |



**Cell cytotoxicity** A549 cells (Sigma Aldrich, Gillingham, UK) were seeded in 96-well plates (5000 cells per well in Ham's F12 Kaighn's medium [Thermofisher Scientific] supplemented with 10% FCS maintained in a humidified incubator at 37°C, 5% CO<sub>2</sub>) and treated with increasing concentrations of galectin-3 inhibitor from 123 nM to 90 μM for 72 h. Cell viability was determined using an MTT (3-[4,5-dimethylthiazol-2-yl]-2,5 diphenyl tetrazolium bromide) assay (PromoCell, Germany) as per the manufacturer's instructions. Absorbance values were read on a plate reader (CLARIOstar Plus, BMG Labtech) at 570 nm with a reference wavelength of 630 nm; background corrected results (calculated as OD570-OD630) were expressed as a percentage of DMSO-treated cells. Non-linear regression (using [Inhibitor] vs response – variable slope [four parameter] equation) was applied to determine IC<sub>50</sub> values (Graphpad Prism, San Diego, CA, USA). Individual experiments were performed in duplicate and data shown are the mean ± standard deviation (SD) from at least 2 separate occasions.

**Table S2.** Cell cytotoxicity of **11d** in A549 cells measured by MTT assay.

| <b>Compound</b> | <b>IC<sub>50</sub> (μM)</b> | <b>Maximum % Reduction in Viability</b> |
|-----------------|-----------------------------|-----------------------------------------|
| <b>11d</b>      | >90                         | 43.4 ± 5.80                             |

**Figure S1.** Pharmacokinetic profile of **11d** in female C57BL/6 mice following oral administration with total blood concentrations determined by LC-MS/MS.

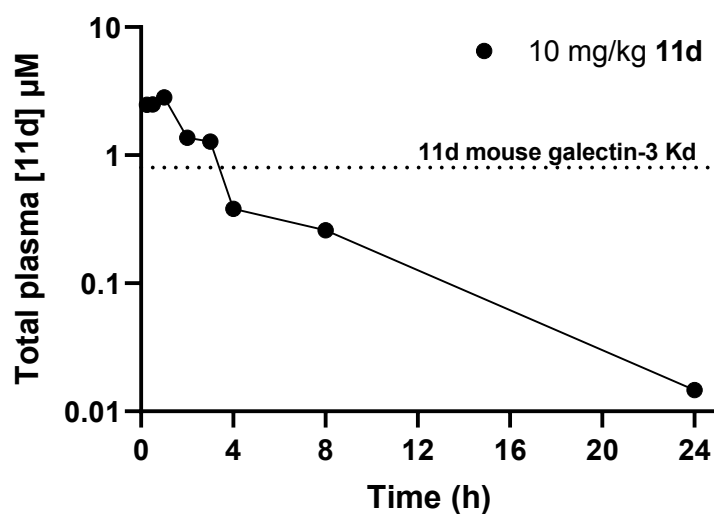

**Bleomycin-induced lung fibrosis.** Male C57BL/6 mice were dosed with 33  $\mu\text{g}$  bleomycin sulfate (Apollo Scientific) in 50  $\mu\text{l}$  saline via oropharyngeal route under brief isoflurane anaesthesia at Day 0. The galectin-3 inhibitor **11d** was prepared at a concentration of 0.2 and 2 mg/mL in 10% solutol:90% PEG300 and administered orally at a dose volume of 10 mL/kg b.i.d on Days 12 to 26 post-bleomycin instillation. Following termination, collagen content in the left lung lobe was determined by Sircol™ (Biocolor) assay as per the manufacturer's instructions.

**Figure S2.** Effect of compound **11d** dosing on lung collagen in a murine bleomycin-induced lung fibrosis model. Mice received 33  $\mu\text{g}$  bleomycin in saline at Day 0 with compound **11d** dosed orally twice daily from Days 12 to 26 post-bleomycin instillation (n=5–8 per group).

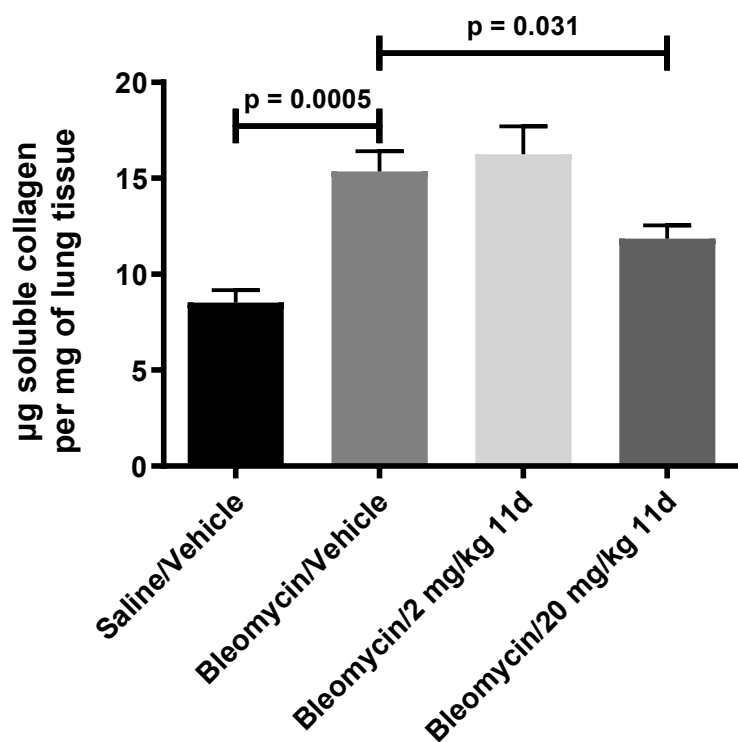

## Specificity screen of 11b and d towards 87 different targets

The specificity of compound **11b** and **d** were tested against a panel of 87 different targets (enzymes, receptors and ion channels, supplementary material, S20, part of a safety screen provided by Eurofins (PanLabs)).

### 11b

---

| Cat #  | Assay Name                                         | Species | Conc. | % Inh. | IC <sub>50</sub> * | K <sub>i</sub> | n <sub>H</sub> |
|--------|----------------------------------------------------|---------|-------|--------|--------------------|----------------|----------------|
| 214510 | Calcium Channel L-Type, Benzothiazepine            | rat     | 10 μM | 50     |                    |                |                |
| 214600 | Calcium Channel L-Type, Dihydropyridine            | rat     | 10 μM | 59     |                    |                |                |
| 215000 | Calcium Channel L-Type, Phenylalkylamine           | rat     | 10 μM | 55     |                    |                |                |
| 271700 | Serotonin (5-Hydroxytryptamine) 5-HT <sub>2B</sub> | hum     | 10 μM | 50     |                    |                |                |
| 220320 | Transporter, Dopamine (DAT)                        | hum     | 10 μM | 82     |                    |                |                |

## Experimental Results

| Cat #                                     | Assay Name                                           | Batch* | Spec.  | Rep. | Conc. | % Inh. | IC <sub>50</sub> * | K <sub>i</sub> | n <sub>H</sub> | R |
|-------------------------------------------|------------------------------------------------------|--------|--------|------|-------|--------|--------------------|----------------|----------------|---|
| <b>Compound: GB1107-03, PT #: 1189509</b> |                                                      |        |        |      |       |        |                    |                |                |   |
| 107710                                    | ATPase, Na <sup>+</sup> /K <sup>+</sup> , Heart, Pig | 368169 | pig    | 2    | 10 μM | 6      |                    |                |                |   |
| 104010                                    | Cholinesterase, Acetyl, ACES                         | 368252 | hum    | 2    | 10 μM | 0      |                    |                |                |   |
| 116020                                    | Cyclooxygenase COX-1                                 | 368115 | hum    | 2    | 10 μM | 10     |                    |                |                |   |
| 118010                                    | Cyclooxygenase COX-2                                 | 368116 | hum    | 2    | 10 μM | -12    |                    |                |                |   |
| 140010                                    | Monoamine Oxidase MAO-A                              | 368071 | hum    | 2    | 10 μM | 5      |                    |                |                |   |
| 140120                                    | Monoamine Oxidase MAO-B                              | 368072 | hum    | 2    | 10 μM | 11     |                    |                |                |   |
| 107300                                    | Peptidase, Angiotensin Converting Enzyme             | 368065 | rabbit | 2    | 10 μM | -3     |                    |                |                |   |
| 112510                                    | Peptidase, CTSG (Cathepsin G)                        | 368255 | hum    | 2    | 10 μM | 5      |                    |                |                |   |
| 152000                                    | Phosphodiesterase PDE3                               | 368188 | hum    | 2    | 10 μM | 17     |                    |                |                |   |
| 154000                                    | Phosphodiesterase PDE4                               | 368189 | hum    | 2    | 10 μM | 5      |                    |                |                |   |
| 178010                                    | Protein Serine/Threonine Kinase, PKC, Non-Selective  | 368276 | rat    | 2    | 10 μM | -12    |                    |                |                |   |
| 174990                                    | Protein Tyrosine Kinase, Insulin Receptor            | 368270 | hum    | 2    | 10 μM | 0      |                    |                |                |   |
| 176020                                    | Protein Tyrosine Kinase, LCK                         | 368182 | hum    | 2    | 10 μM | 11     |                    |                |                |   |
| 200510                                    | Adenosine A <sub>1</sub>                             | 368090 | hum    | 2    | 10 μM | 31     |                    |                |                |   |
| 200610                                    | Adenosine A <sub>2A</sub>                            | 368090 | hum    | 2    | 10 μM | 5      |                    |                |                |   |
| 203100                                    | Adrenergic α <sub>1A</sub>                           | 368060 | rat    | 2    | 10 μM | 16     |                    |                |                |   |
| 203200                                    | Adrenergic α <sub>1B</sub>                           | 368061 | rat    | 2    | 10 μM | 1      |                    |                |                |   |
| 203400                                    | Adrenergic α <sub>1D</sub>                           | 368352 | hum    | 2    | 10 μM | -9     |                    |                |                |   |
| 203630                                    | Adrenergic α <sub>2A</sub>                           | 368096 | hum    | 2    | 10 μM | 10     |                    |                |                |   |
| 203710                                    | Adrenergic α <sub>2B</sub>                           | 368097 | hum    | 2    | 10 μM | 3      |                    |                |                |   |
| 204010                                    | Adrenergic β <sub>1</sub>                            | 368154 | hum    | 2    | 10 μM | 0      |                    |                |                |   |
| 204110                                    | Adrenergic β <sub>2</sub>                            | 368113 | hum    | 2    | 10 μM | 11     |                    |                |                |   |
| 206000                                    | Androgen (Testosterone)                              | 368155 | hum    | 2    | 10 μM | 42     |                    |                |                |   |
| 210030                                    | Angiotensin AT <sub>1</sub>                          | 368341 | hum    | 2    | 10 μM | 13     |                    |                |                |   |
| 212620                                    | Bradykinin B <sub>2</sub>                            | 368214 | hum    | 2    | 10 μM | 8      |                    |                |                |   |
| 214510                                    | Calcium Channel L-Type, Benzothiazepine              | 368062 | rat    | 2    | 10 μM | 50     |                    |                |                |   |
| 214600                                    | Calcium Channel L-Type, Dihydropyridine              | 368098 | rat    | 2    | 10 μM | 59     |                    |                |                |   |
| 215000                                    | Calcium Channel L-Type, Phenylalkylamine             | 368416 | rat    | 2    | 10 μM | 55     |                    |                |                |   |
| 216000                                    | Calcium Channel N-Type                               | 368143 | rat    | 2    | 10 μM | -1     |                    |                |                |   |
| 217030                                    | Cannabinoid CB <sub>1</sub>                          | 368050 | hum    | 2    | 10 μM | 21     |                    |                |                |   |
| 217100                                    | Cannabinoid CB <sub>2</sub>                          | 368058 | hum    | 2    | 10 μM | 16     |                    |                |                |   |
| 217510                                    | Chemokine CCR1                                       | 368342 | hum    | 2    | 10 μM | -7     |                    |                |                |   |
| 244500                                    | Chemokine CXCR2 (IL-8R <sub>B</sub> )                | 368344 | hum    | 2    | 10 μM | -3     |                    |                |                |   |

| Cat #  | Assay Name                                           | Batch* | Spec. | Rep. | Conc. | % Inh. | IC <sub>50</sub> * | K <sub>i</sub> | n <sub>H</sub> | R |
|--------|------------------------------------------------------|--------|-------|------|-------|--------|--------------------|----------------|----------------|---|
| 218030 | Cholecystokinin CCK <sub>1</sub> (CCK <sub>A</sub> ) | 368142 | hum   | 2    | 10 μM | 27     |                    |                |                |   |
| 218130 | Cholecystokinin CCK <sub>2</sub> (CCK <sub>B</sub> ) | 368142 | hum   | 2    | 10 μM | -1     |                    |                |                |   |
| 219500 | Dopamine D <sub>1</sub>                              | 368048 | hum   | 2    | 10 μM | 15     |                    |                |                |   |
| 219600 | Dopamine D <sub>2L</sub>                             | 368040 | hum   | 2    | 10 μM | 10     |                    |                |                |   |
| 219700 | Dopamine D <sub>2S</sub>                             | 368047 | hum   | 2    | 10 μM | 3      |                    |                |                |   |
| 224010 | Endothelin ET <sub>A</sub>                           | 368216 | hum   | 2    | 10 μM | -9     |                    |                |                |   |
| 226010 | Estrogen ER <sub>α</sub>                             | 368250 | hum   | 2    | 10 μM | -4     |                    |                |                |   |
| 226810 | GABA <sub>A</sub> , Chloride Channel, TBOB           | 368158 | rat   | 2    | 10 μM | 49     |                    |                |                |   |
| 226600 | GABA <sub>A</sub> , Flunitrazepam, Central           | 368105 | rat   | 2    | 10 μM | 1      |                    |                |                |   |
| 226630 | GABA <sub>A</sub> , Ro-15-1788, Hippocampus          | 368343 | rat   | 2    | 10 μM | -4     |                    |                |                |   |
| 228610 | GABA <sub>B1A</sub>                                  | 368212 | hum   | 2    | 10 μM | 12     |                    |                |                |   |
| 232030 | Glucocorticoid                                       | 368094 | hum   | 2    | 10 μM | 24     |                    |                |                |   |
| 232600 | Glutamate, AMPA                                      | 368064 | rat   | 2    | 10 μM | -6     |                    |                |                |   |
| 232700 | Glutamate, Kainate                                   | 368167 | rat   | 2    | 10 μM | 18     |                    |                |                |   |
| 237000 | Glutamate, Metabotropic, mGlu <sub>5</sub>           | 368357 | hum   | 2    | 10 μM | 5      |                    |                |                |   |
| 232810 | Glutamate, NMDA, Agonism                             | 368208 | rat   | 2    | 10 μM | 12     |                    |                |                |   |
| 232910 | Glutamate, NMDA, Glycine                             | 368209 | rat   | 2    | 10 μM | -2     |                    |                |                |   |
| 233000 | Glutamate, NMDA, Phencyclidine                       | 368108 | rat   | 2    | 10 μM | -16    |                    |                |                |   |
| 234000 | Glutamate, NMDA, Polyamine                           | 368210 | rat   | 2    | 10 μM | 13     |                    |                |                |   |
| 239000 | Glycine, Strychnine-Sensitive                        | 368211 | rat   | 2    | 10 μM | 5      |                    |                |                |   |
| 239610 | Histamine H <sub>1</sub>                             | 368089 | hum   | 2    | 10 μM | 11     |                    |                |                |   |
| 239710 | Histamine H <sub>2</sub>                             | 368051 | hum   | 2    | 10 μM | 9      |                    |                |                |   |
| 250460 | Leukotriene, Cysteinyl CysLT <sub>1</sub>            | 368354 | hum   | 2    | 10 μM | 7      |                    |                |                |   |
| 251100 | Melanocortin MC <sub>1</sub>                         | 368279 | hum   | 2    | 10 μM | 3      |                    |                |                |   |
| 251350 | Melanocortin MC <sub>4</sub>                         | 368279 | hum   | 2    | 10 μM | 2      |                    |                |                |   |
| 252610 | Muscarinic M <sub>1</sub>                            | 368308 | hum   | 2    | 10 μM | 17     |                    |                |                |   |
| 252710 | Muscarinic M <sub>2</sub>                            | 368093 | hum   | 2    | 10 μM | 5      |                    |                |                |   |
| 252810 | Muscarinic M <sub>3</sub>                            | 368093 | hum   | 2    | 10 μM | 4      |                    |                |                |   |
| 252910 | Muscarinic M <sub>4</sub>                            | 368307 | hum   | 2    | 10 μM | 9      |                    |                |                |   |
| 257010 | Neuropeptide Y Y <sub>1</sub>                        | 368218 | hum   | 2    | 10 μM | 4      |                    |                |                |   |
| 258590 | Nicotinic Acetylcholine                              | 368106 | hum   | 2    | 10 μM | 12     |                    |                |                |   |
| 258700 | Nicotinic Acetylcholine α1, Bungarotoxin             | 368107 | hum   | 2    | 10 μM | 0      |                    |                |                |   |
| 260130 | Opiate δ <sub>1</sub> (OP1, DOP)                     | 368059 | hum   | 2    | 10 μM | -2     |                    |                |                |   |
| 260210 | Opiate κ (OP2, KOP)                                  | 368059 | hum   | 2    | 10 μM | 6      |                    |                |                |   |
| 260410 | Opiate μ (OP3, MOP)                                  | 368101 | hum   | 2    | 10 μM | -3     |                    |                |                |   |
| 265010 | Platelet Activating Factor (PAF)                     | 368095 | hum   | 2    | 10 μM | 0      |                    |                |                |   |

## Experimental Results

| Cat #  | Assay Name                                          | Batch* | Spec. | Rep. | Conc. | % Inh. | IC <sub>50</sub> * | K <sub>i</sub> | n <sub>H</sub> | R |
|--------|-----------------------------------------------------|--------|-------|------|-------|--------|--------------------|----------------|----------------|---|
| 265600 | Potassium Channel [K <sub>ATP</sub> ]               | 368166 | ham   | 2    | 10 μM | 0      |                    |                |                |   |
| 265900 | Potassium Channel hERG                              | 368110 | hum   | 2    | 10 μM | 36     |                    |                |                |   |
| 267500 | PPAR $\gamma$                                       | 368148 | hum   | 2    | 10 μM | 4      |                    |                |                |   |
| 299005 | Progesterone PR-B                                   | 368039 | hum   | 2    | 10 μM | 11     |                    |                |                |   |
| 271110 | Serotonin (5-Hydroxytryptamine) 5-HT <sub>1A</sub>  | 368213 | hum   | 2    | 10 μM | 4      |                    |                |                |   |
| 271230 | Serotonin (5-Hydroxytryptamine) 5-HT <sub>1B</sub>  | 368042 | hum   | 2    | 10 μM | 2      |                    |                |                |   |
| 271650 | Serotonin (5-Hydroxytryptamine) 5-HT <sub>2A</sub>  | 368161 | hum   | 2    | 10 μM | 7      |                    |                |                |   |
| 271700 | Serotonin (5-Hydroxytryptamine) 5-HT <sub>2B</sub>  | 368100 | hum   | 2    | 10 μM | 50     |                    |                |                |   |
| 271800 | Serotonin (5-Hydroxytryptamine) 5-HT <sub>2C</sub>  | 368163 | hum   | 2    | 10 μM | 17     |                    |                |                |   |
| 271910 | Serotonin (5-Hydroxytryptamine) 5-HT <sub>3</sub>   | 368213 | hum   | 2    | 10 μM | -8     |                    |                |                |   |
| 279510 | Sodium Channel, Site 2                              | 368104 | rat   | 2    | 10 μM | 44     |                    |                |                |   |
| 255520 | Tachykinin NK <sub>1</sub>                          | 368217 | hum   | 2    | 10 μM | 41     |                    |                |                |   |
| 202000 | Transporter, Adenosine                              | 368207 | gp    | 2    | 10 μM | 49     |                    |                |                |   |
| 220320 | Transporter, Dopamine (DAT)                         | 368045 | hum   | 2    | 10 μM | 82     |                    |                |                |   |
| 226400 | Transporter, GABA                                   | 368151 | rat   | 2    | 10 μM | 13     |                    |                |                |   |
| 204410 | Transporter, Norepinephrine (NET)                   | 368044 | hum   | 2    | 10 μM | 45     |                    |                |                |   |
| 274030 | Transporter, Serotonin (5-Hydroxytryptamine) (SERT) | 368063 | hum   | 2    | 10 μM | 2      |                    |                |                |   |
| 287530 | Vasopressin V <sub>1A</sub>                         | 368345 | hum   | 2    | 10 μM | -3     |                    |                |                |   |

11d

## Experimental Results

| Cat #                                     | Assay Name                                           | Batch* | Spec.  | Rep. | Conc. | % Inh. | IC <sub>50</sub> * | K <sub>i</sub> | n <sub>H</sub> | R |
|-------------------------------------------|------------------------------------------------------|--------|--------|------|-------|--------|--------------------|----------------|----------------|---|
| <b>Compound: GB1211-02, PT #: 1192815</b> |                                                      |        |        |      |       |        |                    |                |                |   |
| 107710                                    | ATPase, Na <sup>+</sup> /K <sup>+</sup> , Heart, Pig | 375396 | pig    | 2    | 10 μM | -3     |                    |                |                |   |
| 104010                                    | Cholinesterase, Acetyl, ACES                         | 375394 | hum    | 2    | 10 μM | -4     |                    |                |                |   |
| 116020                                    | Cyclooxygenase COX-1                                 | 375331 | hum    | 2    | 10 μM | 13     |                    |                |                |   |
| 118010                                    | Cyclooxygenase COX-2                                 | 375332 | hum    | 2    | 10 μM | -3     |                    |                |                |   |
| 140010                                    | Monoamine Oxidase MAO-A                              | 375398 | hum    | 2    | 10 μM | 5      |                    |                |                |   |
| 140120                                    | Monoamine Oxidase MAO-B                              | 375399 | hum    | 2    | 10 μM | 9      |                    |                |                |   |
| 107300                                    | Peptidase, Angiotensin Converting Enzyme             | 375395 | rabbit | 2    | 10 μM | -1     |                    |                |                |   |
| 112510                                    | Peptidase, CTSG (Cathepsin G)                        | 375397 | hum    | 2    | 10 μM | -4     |                    |                |                |   |
| 152000                                    | Phosphodiesterase PDE3                               | 375469 | hum    | 2    | 10 μM | 2      |                    |                |                |   |
| 154000                                    | Phosphodiesterase PDE4                               | 375470 | hum    | 2    | 10 μM | -21    |                    |                |                |   |
| 178010                                    | Protein Serine/Threonine Kinase, PKC, Non-Selective  | 375538 | rat    | 2    | 10 μM | 1      |                    |                |                |   |
| 174990                                    | Protein Tyrosine Kinase, Insulin Receptor            | 375536 | hum    | 2    | 10 μM | -15    |                    |                |                |   |
| 176020                                    | Protein Tyrosine Kinase, LCK                         | 375537 | hum    | 2    | 10 μM | -5     |                    |                |                |   |
| 200510                                    | Adenosine A <sub>1</sub>                             | 375278 | hum    | 2    | 10 μM | 4      |                    |                |                |   |
| 200610                                    | Adenosine A <sub>2A</sub>                            | 375279 | hum    | 2    | 10 μM | 6      |                    |                |                |   |
| 203100                                    | Adrenergic α <sub>1A</sub>                           | 375262 | rat    | 2    | 10 μM | 3      |                    |                |                |   |
| 203200                                    | Adrenergic α <sub>1B</sub>                           | 375263 | rat    | 2    | 10 μM | 11     |                    |                |                |   |
| 203400                                    | Adrenergic α <sub>1D</sub>                           | 375314 | hum    | 2    | 10 μM | 7      |                    |                |                |   |
| 203630                                    | Adrenergic α <sub>2A</sub>                           | 375280 | hum    | 2    | 10 μM | -3     |                    |                |                |   |
| 203710                                    | Adrenergic α <sub>2B</sub>                           | 375353 | hum    | 2    | 10 μM | 1      |                    |                |                |   |
| 204010                                    | Adrenergic β <sub>1</sub>                            | 375272 | hum    | 2    | 10 μM | 3      |                    |                |                |   |
| 204110                                    | Adrenergic β <sub>2</sub>                            | 375281 | hum    | 2    | 10 μM | 5      |                    |                |                |   |
| 206000                                    | Androgen (Testosterone)                              | 375333 | hum    | 2    | 10 μM | 1      |                    |                |                |   |
| 210030                                    | Angiotensin AT <sub>1</sub>                          | 375518 | hum    | 2    | 10 μM | 7      |                    |                |                |   |
| 212620                                    | Bradykinin B <sub>2</sub>                            | 375316 | hum    | 2    | 10 μM | -5     |                    |                |                |   |
| 214510                                    | Calcium Channel L-Type, Benzothiazepine              | 375307 | rat    | 2    | 10 μM | 5      |                    |                |                |   |
| 214600                                    | Calcium Channel L-Type, Dihydropyridine              | 375261 | rat    | 2    | 10 μM | -13    |                    |                |                |   |
| 215000                                    | Calcium Channel L-Type, Phenylalkylamine             | 375277 | rat    | 2    | 10 μM | 5      |                    |                |                |   |
| 216000                                    | Calcium Channel N-Type                               | 375348 | rat    | 2    | 10 μM | -3     |                    |                |                |   |
| 217030                                    | Cannabinoid CB <sub>1</sub>                          | 375228 | hum    | 2    | 10 μM | 2      |                    |                |                |   |
| 217100                                    | Cannabinoid CB <sub>2</sub>                          | 375359 | hum    | 2    | 10 μM | 21     |                    |                |                |   |
| 217510                                    | Chemokine CCR1                                       | 375425 | hum    | 2    | 10 μM | -12    |                    |                |                |   |
| 244500                                    | Chemokine CXCR2 (IL-8R <sub>B</sub> )                | 375352 | hum    | 2    | 10 μM | 11     |                    |                |                |   |

Note: Items meeting criteria for significance (≥50% stimulation or inhibition) are highlighted.

\* Batch: Represents compounds tested concurrently in the same assay(s).

gp=Guinea pig; ham=Hamster; hum=Human



| Cat #  | Assay Name                                           | Batch* | Spec. | Rep. | Conc. | % Inh. | IC <sub>50</sub> * | K <sub>i</sub> | n <sub>H</sub> | R |
|--------|------------------------------------------------------|--------|-------|------|-------|--------|--------------------|----------------|----------------|---|
| 218030 | Cholecystokinin CCK <sub>1</sub> (CCK <sub>A</sub> ) | 375319 | hum   | 2    | 10 μM | -5     |                    |                |                |   |
| 218130 | Cholecystokinin CCK <sub>2</sub> (CCK <sub>B</sub> ) | 375319 | hum   | 2    | 10 μM | -1     |                    |                |                |   |
| 219500 | Dopamine D <sub>1</sub>                              | 375264 | hum   | 2    | 10 μM | -4     |                    |                |                |   |
| 219600 | Dopamine D <sub>2L</sub>                             | 375367 | hum   | 2    | 10 μM | 15     |                    |                |                |   |
| 219700 | Dopamine D <sub>2S</sub>                             | 375282 | hum   | 2    | 10 μM | -8     |                    |                |                |   |
| 224010 | Endothelin ET <sub>A</sub>                           | 375317 | hum   | 2    | 10 μM | 13     |                    |                |                |   |
| 226010 | Estrogen ER $\alpha$                                 | 375320 | hum   | 2    | 10 μM | 2      |                    |                |                |   |
| 226810 | GABA <sub>A</sub> , Chloride Channel, TBOB           | 375349 | rat   | 2    | 10 μM | 19     |                    |                |                |   |
| 226600 | GABA <sub>A</sub> , Flunitrazepam, Central           | 375266 | rat   | 2    | 10 μM | -2     |                    |                |                |   |
| 226630 | GABA <sub>A</sub> , Ro-15-1788, Hippocampus          | 375305 | rat   | 2    | 10 μM | -9     |                    |                |                |   |
| 228610 | GABA <sub>B1A</sub>                                  | 375240 | hum   | 2    | 10 μM | 1      |                    |                |                |   |
| 232030 | Glucocorticoid                                       | 375549 | hum   | 2    | 10 μM | -2     |                    |                |                |   |
| 232600 | Glutamate, AMPA                                      | 375231 | rat   | 2    | 10 μM | 1      |                    |                |                |   |
| 232700 | Glutamate, Kainate                                   | 375342 | rat   | 2    | 10 μM | -13    |                    |                |                |   |
| 237000 | Glutamate, Metabotropic, mGlu <sub>5</sub>           | 375431 | hum   | 2    | 10 μM | 10     |                    |                |                |   |
| 232810 | Glutamate, NMDA, Agonism                             | 375309 | rat   | 2    | 10 μM | -1     |                    |                |                |   |
| 232910 | Glutamate, NMDA, Glycine                             | 375310 | rat   | 2    | 10 μM | -13    |                    |                |                |   |
| 233000 | Glutamate, NMDA, Phencyclidine                       | 375283 | rat   | 2    | 10 μM | 4      |                    |                |                |   |
| 234000 | Glutamate, NMDA, Polyamine                           | 375355 | rat   | 2    | 10 μM | -4     |                    |                |                |   |
| 239000 | Glycine, Strychnine-Sensitive                        | 375343 | rat   | 2    | 10 μM | -4     |                    |                |                |   |
| 239610 | Histamine H <sub>1</sub>                             | 375267 | hum   | 2    | 10 μM | -16    |                    |                |                |   |
| 239710 | Histamine H <sub>2</sub>                             | 375404 | hum   | 2    | 10 μM | -1     |                    |                |                |   |
| 250460 | Leukotriene, Cysteinyl CysLT <sub>1</sub>            | 375312 | hum   | 2    | 10 μM | 6      |                    |                |                |   |
| 251100 | Melanocortin MC <sub>1</sub>                         | 375335 | hum   | 2    | 10 μM | 1      |                    |                |                |   |
| 251350 | Melanocortin MC <sub>4</sub>                         | 375335 | hum   | 2    | 10 μM | -3     |                    |                |                |   |
| 252610 | Muscarinic M <sub>1</sub>                            | 375244 | hum   | 2    | 10 μM | -4     |                    |                |                |   |
| 252710 | Muscarinic M <sub>2</sub>                            | 375243 | hum   | 2    | 10 μM | 8      |                    |                |                |   |
| 252810 | Muscarinic M <sub>3</sub>                            | 375243 | hum   | 2    | 10 μM | 6      |                    |                |                |   |
| 252910 | Muscarinic M <sub>4</sub>                            | 375244 | hum   | 2    | 10 μM | 1      |                    |                |                |   |
| 257010 | Neuropeptide Y Y <sub>1</sub>                        | 375324 | hum   | 2    | 10 μM | 8      |                    |                |                |   |
| 258590 | Nicotinic Acetylcholine                              | 375269 | hum   | 2    | 10 μM | 11     |                    |                |                |   |
| 258700 | Nicotinic Acetylcholine $\alpha$ 1, Bungarotoxin     | 375270 | hum   | 2    | 10 μM | 5      |                    |                |                |   |
| 260130 | Opiate $\delta$ <sub>1</sub> (OP1, DOP)              | 375247 | hum   | 2    | 10 μM | 0      |                    |                |                |   |
| 260210 | Opiate $\kappa$ (OP2, KOP)                           | 375247 | hum   | 2    | 10 μM | 2      |                    |                |                |   |
| 260410 | Opiate $\mu$ (OP3, MOP)                              | 375247 | hum   | 2    | 10 μM | 1      |                    |                |                |   |
| 265010 | Platelet Activating Factor (PAF)                     | 375334 | hum   | 2    | 10 μM | 21     |                    |                |                |   |

Note: Items meeting criteria for significance ( $\geq 50\%$  stimulation or inhibition) are highlighted.

\* Batch: Represents compounds tested concurrently in the same assay(s).

gp=Guinea pig; ham=Hamster; hum=Human

| Cat #  | Assay Name                                          | Batch* | Spec. | Rep. | Conc. | % Inh. | IC <sub>50</sub> * | K <sub>i</sub> | n <sub>H</sub> | R |
|--------|-----------------------------------------------------|--------|-------|------|-------|--------|--------------------|----------------|----------------|---|
| 265600 | Potassium Channel [K <sub>ATP</sub> ]               | 375522 | ham   | 2    | 10 μM | 25     |                    |                |                |   |
| 265900 | Potassium Channel hERG                              | 375253 | hum   | 2    | 10 μM | 20     |                    |                |                |   |
| 267500 | PPAR $\gamma$                                       | 375300 | hum   | 2    | 10 μM | 0      |                    |                |                |   |
| 299005 | Progesterone PR-B                                   | 375344 | hum   | 2    | 10 μM | 0      |                    |                |                |   |
| 271110 | Serotonin (5-Hydroxytryptamine) 5-HT <sub>1A</sub>  | 375328 | hum   | 2    | 10 μM | 7      |                    |                |                |   |
| 271230 | Serotonin (5-Hydroxytryptamine) 5-HT <sub>1B</sub>  | 375330 | hum   | 2    | 10 μM | -7     |                    |                |                |   |
| 271650 | Serotonin (5-Hydroxytryptamine) 5-HT <sub>2A</sub>  | 375510 | hum   | 2    | 10 μM | 7      |                    |                |                |   |
| 271700 | Serotonin (5-Hydroxytryptamine) 5-HT <sub>2B</sub>  | 375252 | hum   | 2    | 10 μM | 12     |                    |                |                |   |
| 271800 | Serotonin (5-Hydroxytryptamine) 5-HT <sub>2C</sub>  | 375274 | hum   | 2    | 10 μM | 8      |                    |                |                |   |
| 271910 | Serotonin (5-Hydroxytryptamine) 5-HT <sub>3</sub>   | 375329 | hum   | 2    | 10 μM | 0      |                    |                |                |   |
| 279510 | Sodium Channel, Site 2                              | 375275 | rat   | 2    | 10 μM | 23     |                    |                |                |   |
| 255520 | Tachykinin NK <sub>1</sub>                          | 375340 | hum   | 2    | 10 μM | -3     |                    |                |                |   |
| 202000 | Transporter, Adenosine                              | 375519 | gp    | 2    | 10 μM | 15     |                    |                |                |   |
| 220320 | Transporter, Dopamine (DAT)                         | 375285 | hum   | 2    | 10 μM | 18     |                    |                |                |   |
| 226400 | Transporter, GABA                                   | 375341 | rat   | 2    | 10 μM | 9      |                    |                |                |   |
| 204410 | Transporter, Norepinephrine (NET)                   | 375260 | hum   | 2    | 10 μM | 12     |                    |                |                |   |
| 274030 | Transporter, Serotonin (5-Hydroxytryptamine) (SERT) | 375311 | hum   | 2    | 10 μM | 8      |                    |                |                |   |
| 287530 | Vasopressin V <sub>1A</sub>                         | 375322 | hum   | 2    | 10 μM | 5      |                    |                |                |   |

***In vitro* assessment of effects of 11b and 11d on human potassium channel using human embryonic kidney (HEK) 293 cells transfected with a human ether-a-go-go-related gene (hERG)**

*In vitro* assessment were performed at IPS Therapeutique (Sherbrooke, Canada)

The transfected HEK293 cells were submitted to five (5) minutes of exposure to each concentration (0.1, 1 and 10μM) in presence of closed circuit perfusion (2mL/min). Five (5)minutes for washout periods in presence of a flow-through perfusion (2mL/min) in addition to a closed circuit perfusion (2mL/min). The positive control (100 nM E-4031) was added to naivel cells obtained from the same cell line and same passage for a period of 5 minutes in presence of a closed circuit perfusion (2mL/min). Cells were under continuous stimulation of the pulses protocol throughout the experiments and cell currents were recorded after 5 minutes of exposure to each condition. Whole-cell currents elicited during a voltage pulse were recorded in baseline conditions and following the application of the selected concentrations of test article. Currents were also recorded following a washout period. The cells were depolarized for one second from the holding potential (-80 mV) to a maximum value of +40 mV, starting at -40mV and progressing in 10 mV increments. The membrane potential was then repolarized to -55 mV for one second, and finally returned to -80 mV. Whole-cell tail current amplitude was measured at a holding potential of -55mV, following activation of the current from-40to +40 mV. Current amplitude was measured at the maximum (peak) of this tail current. Current density was obtained by dividing current amplitude by cell capacitance measured prior to capacitive transient minimisation. All data points presented have been corrected for solvent effects and time-dependent current run-down.

| Compound   | Statistically significant inhibition starting at ( $\mu\text{M}$ ) | Maximal inhibition (%) | IC50 ( $\mu\text{M}$ ) |
|------------|--------------------------------------------------------------------|------------------------|------------------------|
| <b>11b</b> | 0.1                                                                | 61                     | 2.9                    |
| <b>11d</b> | 1                                                                  | 36                     | not applicable         |

### ***In vivo* assessment of QTc effect of 11b and 11d in anesthetized guinea pig**

The evaluation of QTc in anesthetized guinea pigs were performed at **IPS Therapeutique (Sherbrooke, Canada)**. The guinea pigs were anaesthetized with a mixture of 1.5 to 2.0% isoflurane USP (Abbott Laboratories, Montreal Canada) in 95% O<sub>2</sub> and 5% CO<sub>2</sub>. The left jugular vein was cannulated to administer the drug or vehicle. The guinea pigs received three consecutive intravenous injections (i.v.) of 11b and 11d in a cumulative-dose scheme to obtain 3, 10 or 30  $\mu\text{M}$  target plasma concentrations. Each dose was administered ~10 minutes following completion of the assessment from the previous dose. Calculations were based on a body weight of 325-335g and a blood volume of 64 mL/kg. Since the test articles were administered intravenously, 100% bioavailability was assumed. The control-vehicle group received intravenous injections of the same volume of solvent (DMSO/saline). ECG leads were placed on the animal in a lead 1-2-3 configuration. A continuous recording of the ECG was made, starting prior to the first injection, and lasting at least 10 minutes past the last injection (n=3). The PR, RR, QRS and QT intervals were measured in millisecond using cursor readings in the Clampfit 10.2.0.14 module of the pClamp 10.2.0.14 software (Axon Instrument Inc., Foster City, California, USA, [now Molecular Devices Inc.]). Three PR, RR, QRS and QT intervals were measured for each condition and then averaged in Microsoft Excel 2007. All test article data points presented have been corrected for the changes attributable to vehicle exposure and experimental time.

Effect of 11b(blue line) and 11d(red line) on QTc intervals of guinea pigs.

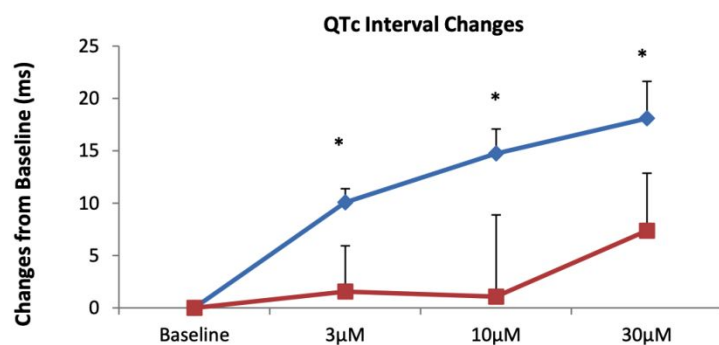

### Co-crystallization of galectin-3 C-terminal domain with compound **11d**

Galectin-3C (C-terminal domain, J. Seetharaman, A. Kanigsberg, R. Slaaby, H. Leffler, S. H. Barondes, J. M. Rini, *J. Biol. Chem.* **1998**, 273, 13047-13052.

) solutions (15 µL, 20 mg/mL in 10 mM sodium phosphate buffer pH 7.5, 100 mM NaCl, and 10 mM β-mercaptoethanol) were mixed with **11d** (0.5 µL, 50 mM in 100% DMSO). The sample was centrifuged at 13500 rpm for 5 min. A seed bead solution (Hampton Research) was used made from crushed apo galectin-3C crystals in a 40-fold diluted seed solution (diluted reservoir solution; see below) was used to seed the crystallisation drops. Drops were setup in MRC 3-well plates and stored at 16 °C with 200 nL galectin-3C: **11d** complex, 30 nL apo galectin-3C seed solution, and 200 nL reservoir solution (30% PEG 4000, 0.1 M Tris/HCl pH 7.5, 0.1 M MgCl<sub>2</sub>, 7.9 mM β-mercaptoethanol) and then equilibrated against 1 ml of reservoir solution containing 30% PEG 4000, 0.1 M Tris/HCl pH 7.5, 0.1M MgCl<sub>2</sub>, 0.4M NaSCN, 7.9 mM β-mercaptoethanol. Large crystals formed (approx. 0.1-0.2 mm) were briefly soaked in a cryoprotectant solution (25.5% PEG4000, 15 % glycerol, 85 mM Tris/HCl pH 7.5, 85 mM MgCl<sub>2</sub>, 250 mM NaSCN, 8 mM β-mercaptoethanol, and 1 mM **11d**). After soaking, the crystal was flash-cooled in liquid N<sub>2</sub>.

### Data collection and structure solution of galectin-3C in complex with **11d**

Data sets were collected at 100K at station PXIII, Swiss Light Source, Villigen, Switzerland ( $\lambda = 1.0000 \text{ \AA}$ ) equipped with a Pilatus 2M-F detector. 900 images were collected using an exposure time of 0.1 s and an oscillation of 0.2° per image. The data were processed using XDS and Aimless to 1.05 Å. (W. Kabsch, *Acta Crystallogr. Sect. D Biol. Crystallogr.* **2010**, 66, 125-132.) A previously-delivered complex determined to 1.2 Å resolution (pdb id 5OAX) (K. Peterson, R.

Kumar, O. Stenström, P. Verma, P. R. Verma, M. Håkansson, B. Kahl-Knutsson, F. Zetterberg, H. Leffler, M. Akke, D. T. Logan, U. J. Nilsson; Systematic Tuning of Fluoro-galectin-3 Interactions Provides Thiodigalactoside Derivatives with Single-Digit nM Affinity and High Selectivity *J. Med. Chem.*, 2018, **61**, 1164-1175, DOI: 10.1021/acs.jmedchem.7b01626) with the ligand removed was used as a starting model for both structures. CCP4-style restraints for **11d** were generated using the JLigand program.( A. A. Lebedev, P. Young, M. N. Isupov, O. V. Moroz, A. A. Vagin, G. N. Murshudov, *Acta Crystallogr. Sect. D Biol. Crystallogr.* **2012**, *68*, 431-440.) After initial rigid body and atomic refinement of the protein coordinates in Refmac5 (Murshudov, G.N., Skubak, P., Lebedev, A.A., Pannu, N.S., Steiner, R.A., Nicholls, R.A., Winn, M.D. Long, F. and Vagin, A.A. (2011) REFMAC5 for the refinement of macromolecular crystal structures, *Acta Crystallogr. D Biol. Crystallogr.* **67**, 355-367.), the coordinates of the compounds were fitted to the electron density using Coot(P. Emsley, B. Lohkamp, W. G. Scott, K. Cowtan, *Acta Crystallogr. Sect. D Biol. Crystallogr.* **2010**, *66*, 486-501. ). The structures were refined until convergence using Refmac5. Individual anisotropic B-factors for each atom were refined. Hydrogen atoms were added in the riding positions. Water molecules were added to positive difference density peaks more than 5 standard deviations above the mean and present in the 2m|Fo|-d|Fc| map at the 1  $\sigma$  level. Molecular images were generated using PyMOL (Schrodinger LLC). Model validation and analysis were performed using MolProbity. (V. B. Chen, W. B. Arendall, J. J. Headd, D. A. Keedy, R. M. Immormino, G. J. Kapral, L. W. Murray, J. S. Richardson, D. C. Richardson, *Acta Crystallogr. Sect. D Biol. Crystallogr.* **2010**, *66*, 12-21. )

Coordinates have been deposited in the Protein Data Bank with accession numbers 7ZQX.

*Data processing and refinement statistics.. Values in parentheses are for the highest resolution shell, unless noted otherwise.*

|                  |                                 |
|------------------|---------------------------------|
| Resolution (Å)   | 29.06 - 1.05 (1.07 - 1.05)      |
| Wavelength (Å)   | 1.0000                          |
| Space group      | P212121                         |
| Unit cell (Å, °) | a = 36.40, b = 58.09, c = 62.58 |

|                                                      |                  |
|------------------------------------------------------|------------------|
| Completeness (%)                                     | 100.0 (99.9)     |
| Redundancy                                           | 6.1 (5.5)        |
| No. of observations / unique reflections             | 383 590 / 62 710 |
| $\langle I/\sigma(I) \rangle$                        | 21.1 (3.0)       |
| CC(1/2) (%)                                          | 100.0 (87.4)     |
| $R_{\text{merge}}$ (I) (%)                           | 3.7 (54.5)       |
| $R_{\text{model}}$ (F) (%)                           | 10.9 (17.6)      |
| $R_{\text{free}}$ (F) (%)                            | 12.9 (18.3)      |
| No. of non-hydrogen atoms                            | 1656             |
| No. of water molecules                               | 263              |
| rms deviations from ideal geometry: Bond lengths (Å) | 0,021            |
| Bond angles (deg)                                    | 2.4              |
| Mean B-factor (protein, Å <sup>2</sup> )             | 11.1             |
| Mean B-factor ( <b>11d</b> , Å <sup>2</sup> )        | 12.9             |
| Mean B-factor (solvent and ions, Å <sup>2</sup> )    | 25.4             |
| <b>Ramachandran plot quality</b>                     |                  |
| Favoured regions (%)                                 | 97.0             |
| Allowed regions (%)                                  | 3.0              |
| Outliers (%)                                         | 0                |

Plots of passage A>B over CACO-2 over ClogD(pH 7.4) and ertlPSA for compounds included in the manuscript. Monogalctosides denoted Mono(red) and thidodigalactosides denoted TDG(blue).

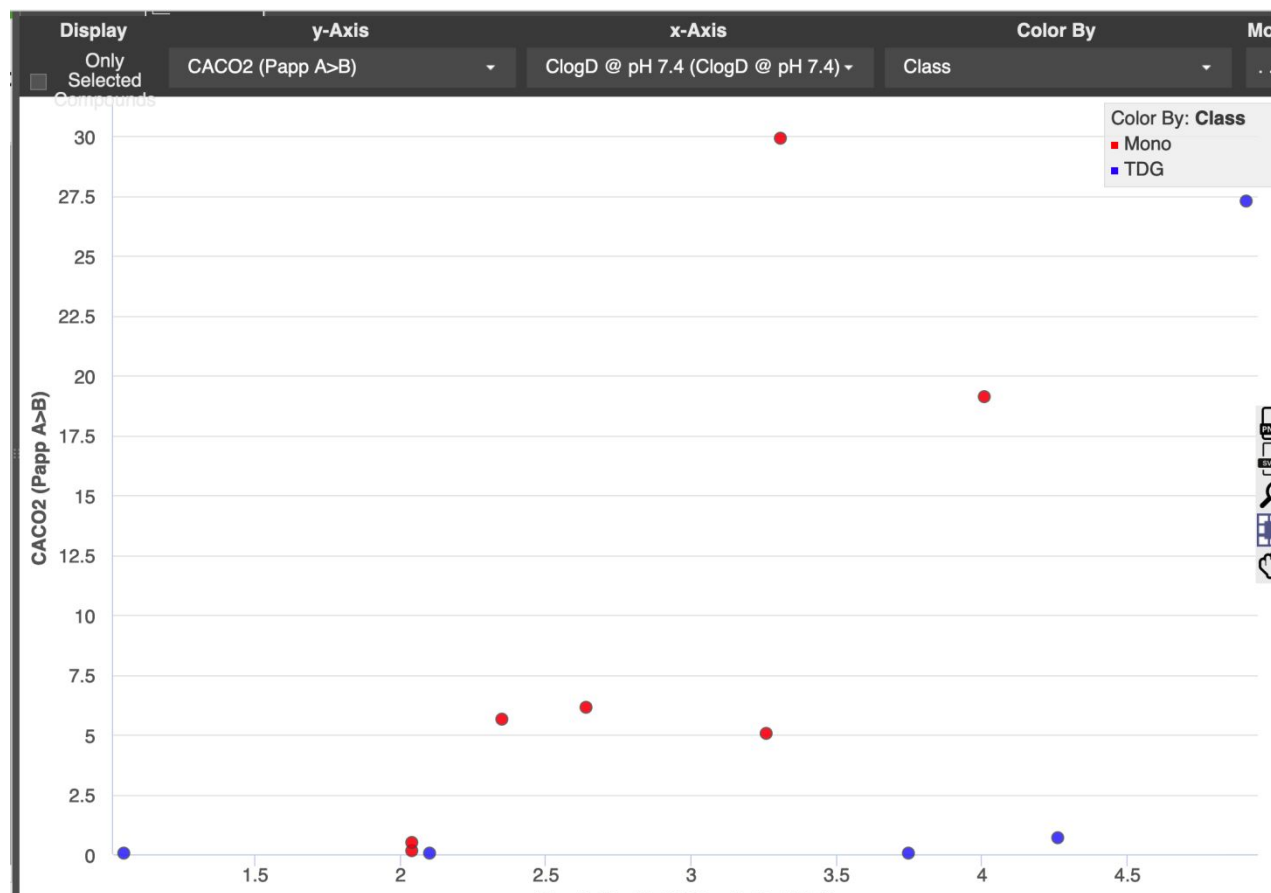

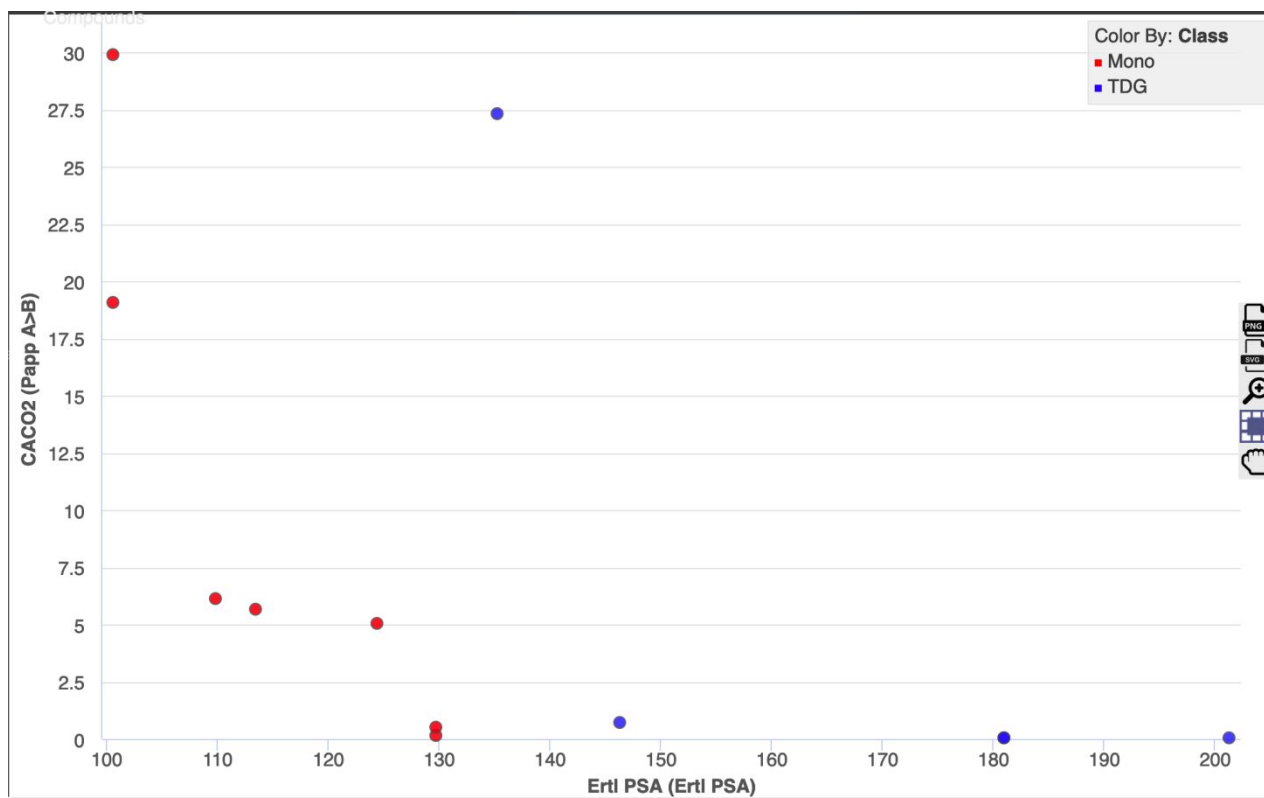

Supplement: jm2c00660_si_001.pdf [file jm2c00660_si_001.pdf]
